1 **Outside-in: intracellular vesicles in giant sulfur bacteria contain peptidoglycan**

2 Beverly E. Flood<sup>a\*</sup>, Dalton J. Leprich<sup>a</sup>, Ryan C. Hunter<sup>b</sup>, Nathalie Delherbe<sup>a#</sup>, Barbara  
3 MacGregor<sup>a</sup>, Michael Van Nieuwenhze<sup>c</sup>, Jake V. Bailey<sup>a\*</sup>

4

5 <sup>a</sup> University of Minnesota, Department of Earth and Environmental Sciences, Minneapolis,  
6 Minnesota, USA

7 <sup>b</sup> University of Minnesota, Department of Microbiology and Immunology, Minneapolis,  
8 Minnesota, USA

9 <sup>c</sup> Department of Biology, Indiana University, Indiana, USA

10 #Current address: Department of Biology, San Diego State University, San Diego, CA,  
11 92182, USA.

12

13 Running Head: Intracellular Vesicles in *Ca. Thiomargarita* spp.

14

15 \*Corresponding authors

16 Email: Jake V. Bailey, [baileyj@umn.edu](mailto:baileyj@umn.edu) and Beverly E. Flood, [beflood@umn.edu](mailto:beflood@umn.edu)

17

## 18 **Abstract**

19 Until recently, the cellular envelopes of bacteria were regarded as static and rigid relative  
20 to those of eukaryotes. While investigating peptidoglycan synthesis in populations of giant  
21 sulfur bacteria, *Candidatus* Thiomargarita spp., we observed internal vesicle-like features  
22 (VLFs). VLFs, as imaged following the active incorporation of D-amino acids, appear to  
23 begin as invaginations and delaminations of the cellular envelope. Staining with wheat  
24 germ agglutinin confirmed the presence of peptidoglycan in VLFs, while polymyxin B  
25 revealed that the outer membrane is present in some VLFs. Transmission electron  
26 microscopy revealed a complex network of interconnected VLFs. Genomes of *Ca.*  
27 *Thiomargarita nelsonii* lack a canonical divisome, while possessing homologs to genes  
28 such as actin, membrane scaffolding proteins, and dynamins that are associated with  
29 phagocytosis in eukaryotes. The physiological role of VLFs remains unclear, but the  
30 presence of sulfur globules in some suggests compartmentalization of metabolism and  
31 energy production. This is the first report of peptidoglycan and outer membrane bound  
32 intracellular vesicles within prokaryotic cells. These findings transform the canonical view  
33 of the inflexible bacterial cell envelope and further narrow the divide between prokaryotes  
34 and eukaryotes.

## 35 **Introduction**

36 Members of the Beggiatoaceae are sulfur-oxidizing bacteria that are some of the largest  
37 bacteria in the world. Morphologically, these bacteria resemble cyanobacteria, a  
38 phylogenetically-distant group with which they have undergone substantial horizontal gene

39 transfer [1-4]. *Ca.* Thiomargarita spp. include the largest known bacteria, with individual  
40 cells reaching up to a millimeter in diameter [5-8], (Fig 1). *Ca.* Thiomargarita cells appear  
41 hollow, with a single central vacuole occupying the majority of the cell volume [7, 8]. Like  
42 diverse marine eukaryotic phyla [9] and some sister marine Beggiatoaceae [10], *Ca.*  
43 Thiomargarita stores nitrate in a large central vacuole at high concentrations relative to the  
44 surrounding seawater [7, 11]. Nitrate serves as a terminal electron acceptor for the  
45 oxidation of sulfide in the absence of sufficient oxygen. The central vacuole may also store  
46 additional substrates and provide additional function(s) [12] but investigative studies are  
47 lacking. *Ca.* Thiomargarita spp. also have the capability of carrying out other types of  
48 lithotrophic and heterotrophic metabolism [7, 8, 13-16]. They store abundant inclusions of  
49 elemental sulfur, polyphosphate, and glycogen in the cytoplasm surrounding the vacuole,  
50 along with genetic material that is thought to include thousands of copies of a cell's  
51 chromosome, reviewed by [8].

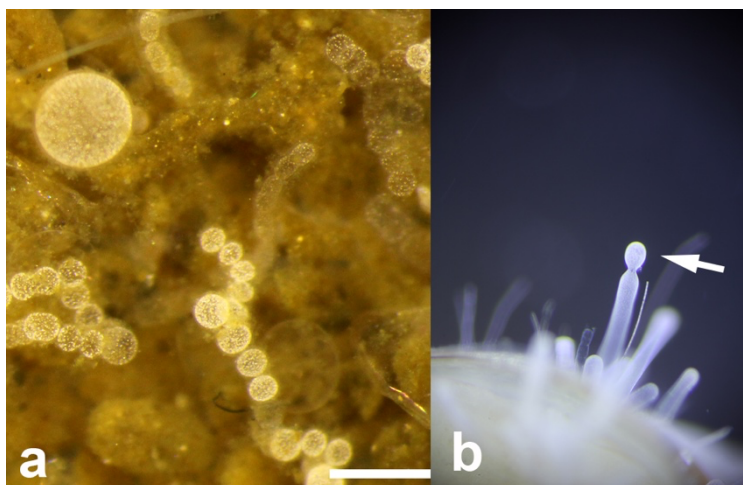

52

53 **Fig 1. Examples of *Ca.* Thiomargarita spp. used in this study.** (a) *Ca.* Thiomargarita  
54 spp. on collection along the Namibian margin exhibit abundant cells in various stages of  
55 division and diversity of cell shape and size. (b) *Ca.* Thiomargarita nelsonii attached to a

56 Provannid gastropod collected from Hydrate Ridge, Pacific Ocean. A genome of this strain  
57 was included in genome analyses. Scale bar is 600  $\mu\text{m}$  for both images.

58 Despite their macroscopic size, *Ca. Thiomargarita* have yet to be cultivated as isolates in  
59 the laboratory. But, some strains of *Ca. Thiomargarita* can remain viable in the laboratory  
60 for more than two years under refrigeration in their host sediments. Two genomes produced  
61 for *Ca. T. nelsonii*, as well as labeling experiments for oxidoreductase activity and  
62 microsensor measurements, suggest that these organisms have diverse metabolic potentials  
63 and are metabolically active following collection [11, 13-15]. Previously, a maintenance  
64 medium containing vitamins and trace metals along with lithotrophic or heterotrophic  
65 electron donors was shown to support metabolic activity in *Ca. Thiomargarita* spp. [11,  
66 15]. Here, we incubated *Ca. Thiomargarita* with fluorescently-labeled D-amino acids  
67 (FDAAs) to visualize active peptidoglycan synthesis [17-19]. Peptidoglycan (PG), which  
68 provides mechanical strength to the cell ultrastructure, is composed of glycan strands  
69 linked by peptide chains containing D-alanine and D-glutamine [20, 21]. Fluorescently-  
70 labeled D-alanine [22] has been used in a variety of studies to facilitate the understanding  
71 of the formation and structure of PG, bacterial growth patterns, and how morphologically  
72 complex cells modulate their growth patterns (reviewed by [19]). Importantly, incorporation  
73 of labeled D-alanine is specific to PG, which is not labeled with the fluorescent enantiomer  
74 L-3-amino-L-alanine [18].

75 In this study, FDAA labeling was initially employed to better understand the rate of  
76 metabolic activity in *Ca. Thiomargarita* spp.. We hypothesized that due to their native  
77 habitat and the lack of observed growth *in vitro* [8], long incubation periods with FDAAs  
78 would be necessary because *Ca. Thiomargarita* are extremely slow growing. Furthermore,

79 we hoped to observe how PG synthesis contributed to their morphology and modes of cell  
80 division (reviewed by [4]). Two previous *Ca. T. nelsonii* genomes [13, 14, 23] and two  
81 genomes produced for this study revealed that they possess the canonical genetic potential  
82 to synthesize PG, with the exception of a candidate gene for the key penicillin-binding  
83 protein 3 (*ftsW*). However, *Ca. Thiomargarita* lacks most of the canonical genetic repertoire  
84 for cell division, except a candidate gene for the septal ring tubulin homologue FtsZ. As  
85 such, we hypothesized that *Ca. Thiomargarita* spp. undergoes observable non-canonical  
86 cellular division.

## 87 **Results**

### 88 **FDAA-labeling reveals active incorporation of PG along** 89 **division planes**

90 PG synthesis is required for cell wall elongation and the formation of the division septum.  
91 We observed incorporation of FDAAs into the *Ca. Thiomargarita* spp. ultrastructure as a  
92 weak but specific fluorescent signal along the cell margins, as well as an intense  
93 fluorescence signal localized at the division septum. FdAA incorporation at the division  
94 plane was observed in both cell trichomes (Fig 2b-c) and individual dividing cells (Fig 2a).  
95 Observable label was present in as little as fifteen minutes, suggesting very active  
96 metabolism (Figs 2b-c, S1 Movie). Label localization was similar to that observed in  
97 FdAA-stained bacteria in earlier studies, e.g. [17]. Labeling experiments conducted for  
98 one week revealed that dead cells do not incorporate FdAA. These observations show that  
99 FDAAs do not exhibit non-specific binding in dead cells, (S1 Fig).

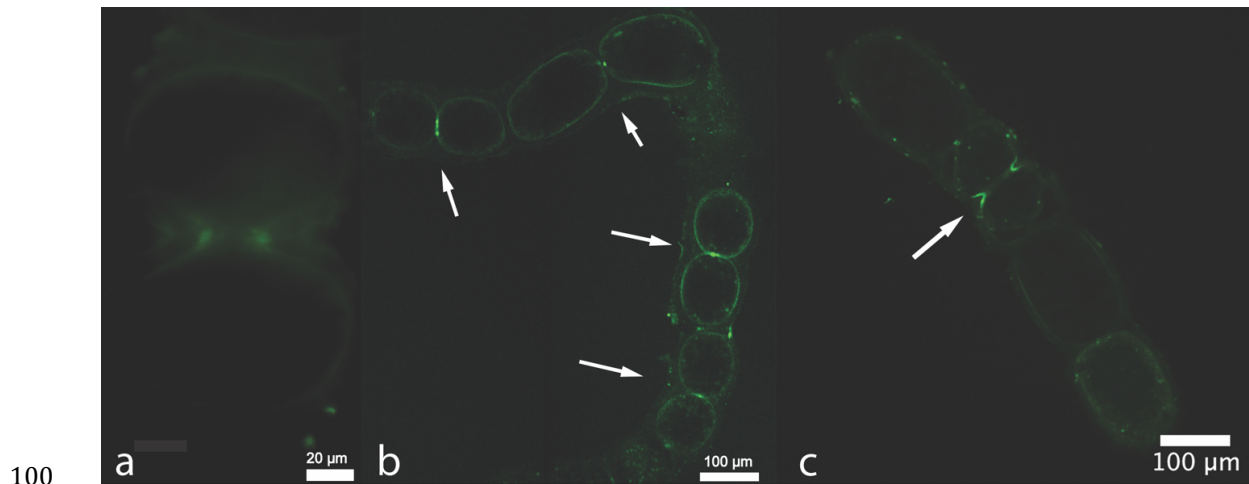

100

101 **Fig 2. *Ca. Thiomargarita* spp. preferentially incorporate FDAAs along the division**  
102 **septum.** (a) Cells incubated for 1 week under anoxic conditions with formate as an electron  
103 donor exhibited evidence of active cell division. (b) Confocal slice of cells exposed to  
104 FDAAs in the laboratory for 15 minutes, cells that appear to be dividing exhibit a  
105 preferential incorporation of FDAAs along the division septum (arrows) suggesting active  
106 PG synthesis associated with cell division. (c) Confocal slice of cells incubated with  
107 FDAAs for 15 minutes revealed reductive division.

108 **FDAA labeling reveals incorporation of peptidoglycan in VLFs**  
109 **originating from the cellular envelope**

110 Active incorporation of FDAA into PG revealed that in some *Ca. Thiomargarita* cells, the  
111 cellular envelope budded inward to produce intracellular “pockets” (Figs 3 and 4). The  
112 cellular envelope surrounding the budding vesicles also exhibited active incorporation of  
113 the FDAAs (Figs 3a-b). In some cases, these pockets appeared to completely bud off from  
114 the cell envelope and became independent intracellular VLFs, (Fig 4a-c). Some unattached  
115 intracellular VLFs also exhibited active incorporation of FDAAs and were located either

116 in the cytoplasm, or in the vacuole as observed in 3D reconstructions from confocal z-  
117 stacks (Fig 4d, S2 and S3 Movies).

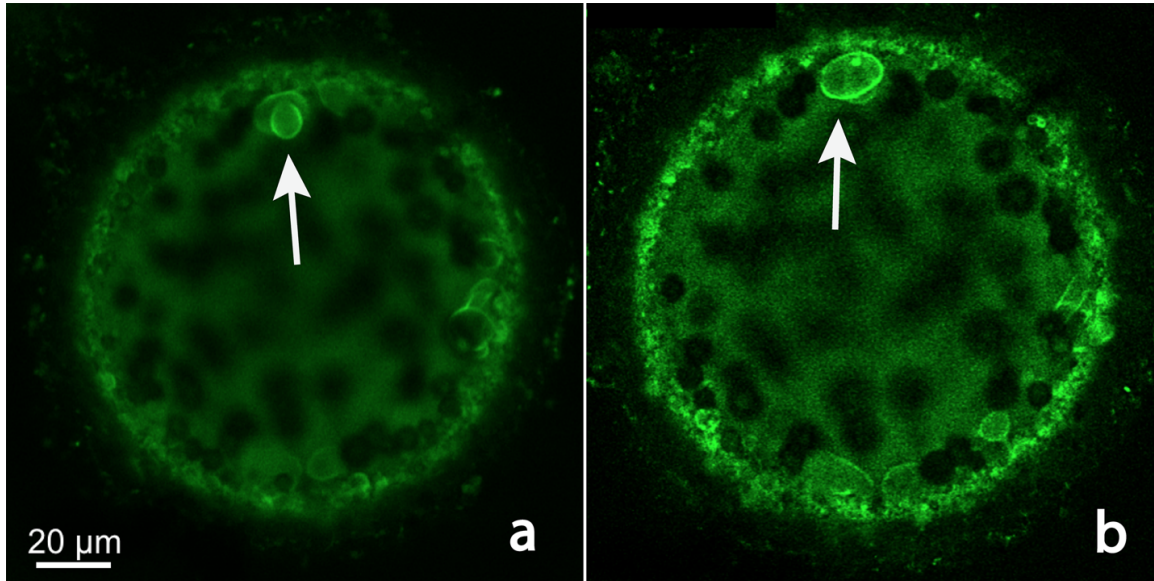

118

119 **Fig 3. FDAA labeling of PG reveals intracellular vesicles form from the cellular**  
120 **envelope.** The incubation time with the labels was 15-30 minutes. Dark intracellular  
121 spheres are sulfur granules. (a) A confocal microscopy slice through a *Ca.* *Thiomargarita*  
122 cell revealed the invagination of the cellular envelope producing an internal pocket/vesicle  
123 (white arrow) that has almost completely detached from the cell wall. (b) The same *Ca.*  
124 *Thiomargarita* cell as in (a) but a confocal microscopy slice closer to the surface of the cell  
125 revealed that there was active incorporation of FDAA in the cellular envelope surrounding  
126 the internal vesicle formation (white arrow). Note the base of the vesicle and a distal ring  
127 of PG around it exhibit the highest amount of incorporation of the FDAA.

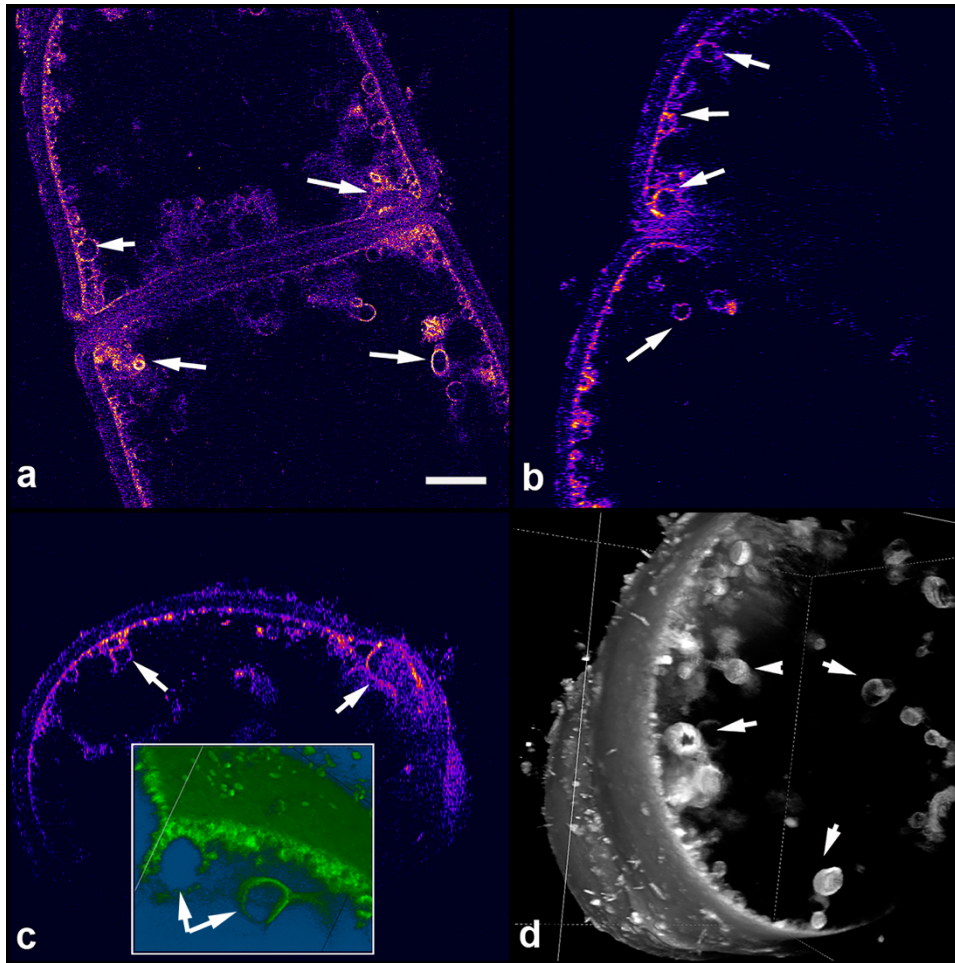

128

129 **Fig 4. Vesicle-like features bounded by PG are actively maintained even after**  
130 **detaching from the cellular envelope. (a-c) Views along three axes of a confocal z-stack**  
131 **of FDAA-labeled *Ca. Thiomargarita* cells undergoing cell division. Invaginations and**  
132 **vesicles are indicated with white arrows. (d). A maximum intensity projection 3-D**  
133 **rendering of the cells in (a-c) showing the vesicles as spheres apparently translocated from**  
134 **the ultrastructure into the vacuole. Scale bar for all is 10  $\mu$ m.**

### 135 **Wheat germ agglutinin labeling for PG**

136 *Ca. T. nelsonii* has the genetic potential to produce metabolites lacking L-stereo-specificity  
137 via non-ribosomal peptide synthetases. We considered the possibility that the vesicle-like



138 features are the products of D-amino acid incorporation by peptides synthesized outside  
139 the ribosome, or by other molecules not previously known to incorporate FDAAs. Wheat  
140 germ agglutinin (WGA) binds specifically to N-acetylglucosamine, a major structural unit  
141 of PG, so this test provides a chemically distinct line of evidence for PG bounding the VLF.  
142 Additionally, while FDAA labeling only reveals active PG synthesis, WGA staining  
143 provides visualization all PG within the cells. The results of the WGA staining were  
144 consistent with FDAA-labeling, and revealed some additional cellular features (Figs 5a-b).  
145 In some cases, we observed multiple layers within the cellular envelope that stained for N-  
146 acetylglucosamine and sometimes appeared to be delaminating. Additionally, sulfur  
147 globules appear to be bound within PG bearing vesicles and vesicular masses (Fig 5c and  
148 S4 Movie). Counterstaining with DAPI revealed that most DNA is located within a thin  
149 region near the cellular envelope, but some DNA is located surrounding large vesicles (Fig  
150 6 and S5 Movie).

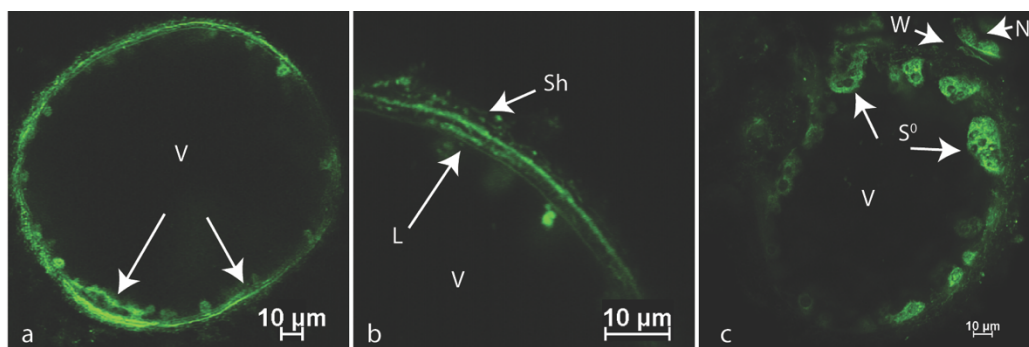

151

152 **Fig 5. Whole cell staining with WGA revealed additional PG bearing features.** V =  
153 vacuole. (a) Confocal microscopy slice through a *Ca. Thiomargarita* spp. cell revealed  
154 possible delamination of PG layer. (b) Increased magnification of cell in (a) revealed  
155 multiple layers and possible delamination, Sh = sheath with epibiont bacteria. (c) Confocal  
156 microscopy z-stack revealed PG bearing accumulating vesicles with some containing

157 sulfur granules within them (dark masses within green), S0 = sulfur granules, W = PG wall,

158 N = neighboring cell.

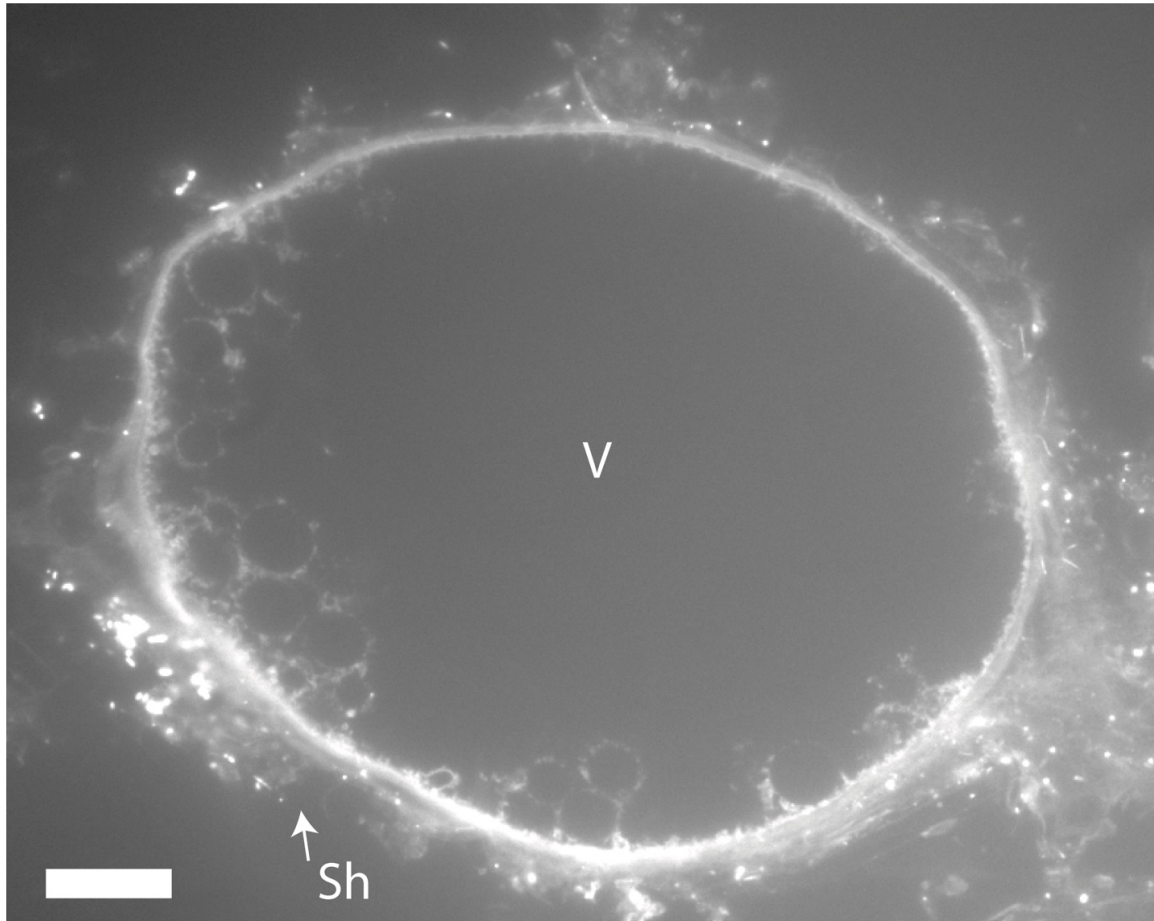

159

160 **Fig 6. DAPI staining of thin sections reveal DNA predominantly in the cytoplasm but**

161 **also associated with vesicles.** V= vacuole, Sh = sheath with epibiont bacteria, scale bar =

162 20  $\mu\text{m}$ .

163 **Fluorescent labeling of thin sections revealed other features of**

164 **VLFs**

165 Co-staining of thin sections with polymyxin B, which binds specifically to lipid A in the  
166 outer membrane, and FM 4-64, a general lipid counterstain, revealed that outer membrane  
167 lipids are also present in some but not all intracellular vesicles (Figs 7a-b). The optical  
168 resolution of light microscopy was insufficient to confirm that outer membrane lipids were  
169 inside the vesicles, but the fluorescence of polymyxin B did encroach further into the  
170 vesicles than that of WGA, which supports the possibility that they are inside as would be  
171 predicted if the entire ultrastructure inverted during infolding.

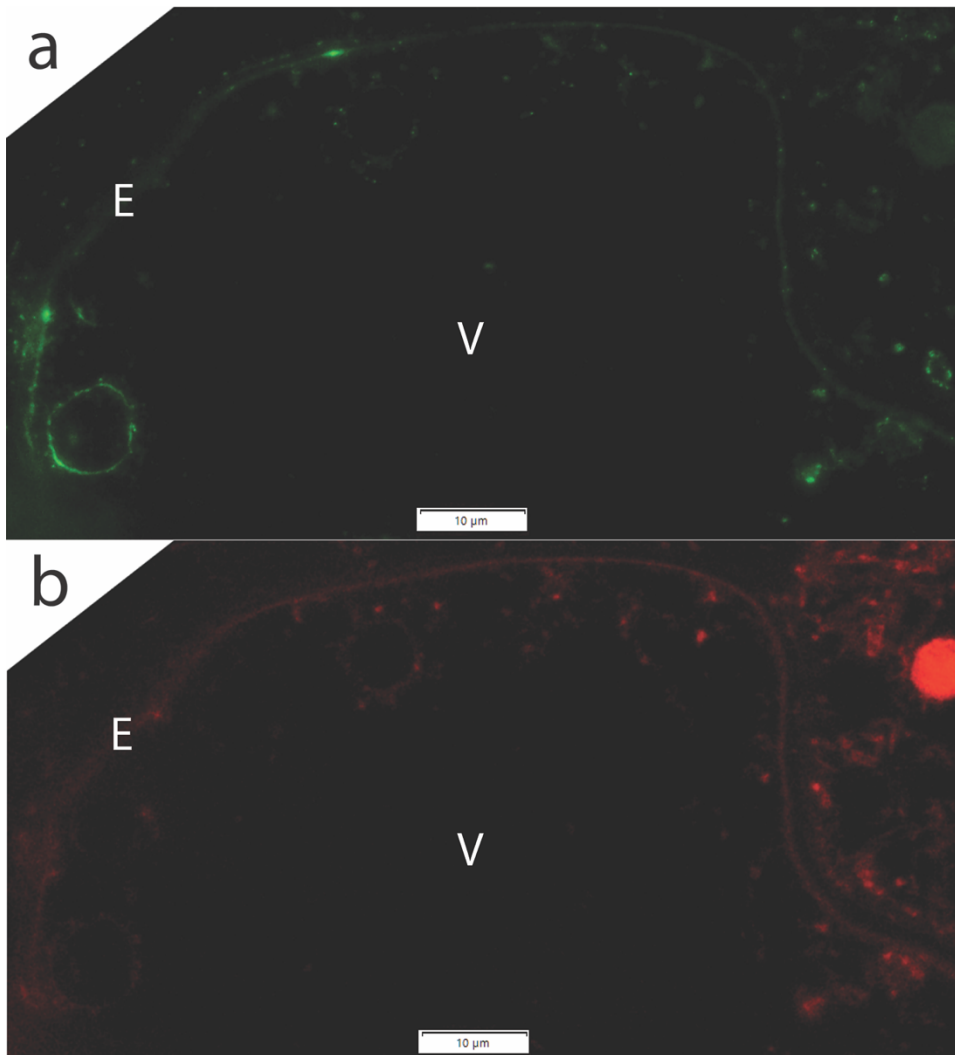

172

173 **Fig 7. Thin sections of *Ca. Thiomargarita* spp. reveal that vesicles sometimes include**  
174 **outer membrane material.** (a) lipid A stained with polymyxin B (b) lipids as stained with  
175 FM4-64, E = envelope, V = vacuole.

## 176 **Transmission electron microscopy**

177 Two distinct fixation and staining methods were employed to address challenges with  
178 preserving the cellular structure of such large cells with vast aqueous interiors that are  
179 prone to collapse e.g. (S2 Fig). TEM revealed VLFs, as observed with light microscopy,  
180 as well as additional features (Fig 8 and S2 Fig). The VLFs varied in size from sub-micron  
181 to more than 50  $\mu\text{m}$  in diameter. While sometimes the VLFs contained sulfur, often they  
182 contained other storage products such as electron-dense inclusion bodies, DNA, and  
183 ribosomes, but most appeared devoid of material that stained with contrast agents. In  
184 general, the cytoplasmic region containing the VLFs appeared as a highly disordered  
185 network of interconnected vesicles of varying sizes. Some of these “networks” were  
186 detached from the main cytoplasmic region. The cellular envelopes, which were  
187 approximately 100 nm thick, consisted of at least five layers. The darkest and thickest stain  
188 layer, presumably PG, was the second observed layer from the interior. The PG layer was  
189 6-10 nm in thickness, which is thicker than some bacteria [24]. Occasionally, VLF  
190 envelopes were contiguous with the cellular envelope or appeared contiguous with  
191 envelope delaminations. The thickness and electron density of VLFs were highly variable.  
192 Some VLFs envelopes appeared somewhat disordered and spongy, while other envelopes  
193 were well-defined layers. A second, thinner layer was sometimes observed interior to the

194 PG-like layer of the VLF. Lastly, we also observed extracellular bilayer vesicles which  
195 were distinctly different in morphology from the VLFs, (S3 Fig).

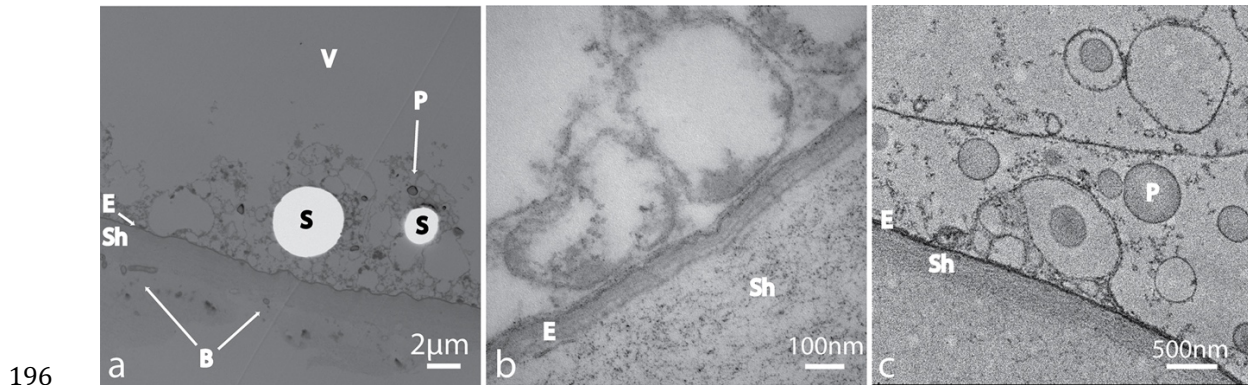

197 **Fig 8 Additional evidence for PG in vesicle-like features was provided by TEM.** (a)  
198 TEM section demonstration heterogeneity in vesicles. Some vesicles contain sulfur  
199 granules (S) but most do not. (b) The cellular envelope (E) is complex consisting of five or  
200 more layers and is almost 100 nm thick. (c) The vesicles envelopes are sometimes on  
201 contiguous with the cellular envelope and can consist of two or more layers. Here vesicles  
202 are sometimes surrounding polyphosphate granules (P) but not always. B = epibiont  
203 bacteria, E = envelope, P = polyphosphate Sh = sheath, and V = vacuolar region. Images  
204 (a) and (b) were samples processed via TEM method #2 and (c) method #1.

## 205 Genome analyses

206 Four *Ca. T. nelsonii* genome bins, two of which were produced herein, were examined for  
207 the genetic potential to synthesize outer membrane lipopolysaccharides, a tethered outer  
208 membrane (Tol-Pal System) [25, 26], meso-diaminopimelate-containing PG, a division  
209 septum, and to carry out cellular elongation [27]. But all genomes lack nearly all canonical  
210 genes associated with Z-ring formation, including those for septal PG synthesis (*ftsIW*) and

211 proteins anchoring FtsZ to the cellular envelope (*ftsABEKLNQX*, *zipA*) (S1 Data). Given  
212 our unusual evidence for PG and OM present in some intracellular vesicles, we expanded  
213 our search to other potential cytoskeletal genes found in morphologically complex bacteria  
214 and their known associated genes, as well as with membrane remodeling and vesicle  
215 formation in eukaryotes. A complete account of genes queried are presented in S2 Data,  
216 with select results potentially related to VLF formation discussed below.

## 217 **Discussion**

218 This project was initiated to investigate whether *Ca. Thiomargarita* spp. were metabolically  
219 active and undergoing cell division *in vitro*. Since we have not witnessed a single dividing  
220 cell exhibit notable changes in cell division in any of our lab's periodic attempts to cultivate  
221 *Ca. Thiomargarita* spp. from our sampling sites off the coast of Namibia over the past 10  
222 years, our initial hypothesis was that we would not see incorporation of FDAAs in short  
223 incubation periods as seen in classic laboratory strains [17, 18]. However, we detected  
224 incorporation of the FDAAs in as little as ten minutes, including localization along the  
225 septal plane. Thus, we conclude that *Ca. Thiomargarita* spp. are actively growing and  
226 dividing within refrigerated samples of their host sediments. Although artificial enrichment  
227 and cultivation attempts tested thus far have been inhibitory to complete cell division and  
228 long-term viability, our previous work using redox-sensitive dyes indicate that the cells are  
229 metabolically active for months to years following collection [15]. We also recently  
230 discovered that *Ca. Thiomargarita* hosts a large number of host-specific epibionts [28].  
231 Consideration of these microorganisms, in addition to *Ca. Thiomargarita*-specific  
232 metabolic attributes, may be important in successful cultivation of *Ca. Thiomargarita*.

233 We were surprised to find that the labeling experiments revealed internal vesicle formation  
234 that included PG and sometimes the outer membrane. The co-occurrence of FDAAs in an  
235 attached vesicle and the neighboring cellular envelope (Fig. 2a-b) suggests that perhaps  
236 structural remodeling of the cellular envelope and/or overproduction of constituents of the  
237 envelope promotes vesicle formation. Internal compartmentalization derived from the  
238 cellular envelope in prokaryotes is not uncommon. But to our knowledge, no other  
239 intracellular bacterial vesicles have been shown to include PG or outer membrane  
240 constituents [29-31]; this includes several studies utilizing FDAAs on morphologically  
241 complex bacteria and those which produce intracellular vesicles, e.g. [32-40].

242 Comparison of numerous TEM studies on the Beggiatoaceae [8, 41-51] suggests that both  
243 the cellular envelope and the intracellular environment of this clade is highly  
244 heterogeneous, even between strains within the same genus. Some strains, including *Ca.*  
245 *Thiomargarita* spp., have up to five layers in the cellular envelope, suggesting the presence  
246 of S-layers. Marine Beggiatoaceae strains tend to exhibit a spongy intracellular appearance  
247 surrounding a central aqueous vacuolar region that is devoid of structure. In general, many  
248 of the Beggiatoaceae appear to have an extremely disordered intracellular environment  
249 where membranes, vesicles, and electron-dense materials like DNA cluster in what appears  
250 to be a disordered fashion. Within the same cell, a VLF may surround carbon stores or  
251 polyphosphate stores, but in other locations in the same cell, storage granules are found  
252 outside of VLFs, and VLFs that possess no storage granules are common. In the  
253 Beggiatoaceae, sulfur globules are usually found within membrane-bound vesicles thought  
254 to be derived from the cytoplasmic membrane. Interestingly, sulfur granule envelopes in  
255 *Beggiatoa alba* B15LD have been observed to be composed of up to five layers [44]. In *B.*

256 *alba* B15LD the sulfur globule “envelope” was destroyed by lysozyme, which acts on PG  
257 [52]. But in most cases, multiple layers of ultrastructure were not observed in  
258 Beggiatoaceae sulfur globules envelopes or the surrounding membrane. The preparation  
259 for TEM can cause artifacts or loss of information in electron micrographs [53, 54]. Some  
260 researchers reported difficulty in preventing mechanical distortion of cells during TEM and  
261 in some cases, the problem of a “lack of differentiating materials” [41]. Others found that  
262 the method chosen for preparation of the sample resulted in the loss of information [43].  
263 Indeed, we encountered all these issues with TEM preparation of *Ca. Thiomargarita* spp.  
264 and preserving intact cells using typical preparation approaches was a challenge, which is  
265 why we turned to microwave impregnation with low viscosity resin.

## 266 **Potential mechanisms for VLF formation**

267 It is possible that increased levels of microdomain lipid synthesis together with alterations  
268 in or detachment from the PG sacculus could alone drive vesicle formation, as for outer-  
269 membrane derived extracellular vesicles (reviewed by [55, 56]). Indeed, L-form bacteria  
270 (a.k.a. cell wall-less bacteria) form both external and internal vesicles [57] and their  
271 replication is independent of an FtsZ-based septum [58]. Outer-membrane vesicles have  
272 been shown to contain PG, so the association of PG with vesicles is not without precedent  
273 [59]. PG was, until recently, thought to be a highly ordered crystalline substance. However,  
274 recent atomic force microscopy imaging shows that different bacterial morphotypes can  
275 have differing degrees of ordering to the cell wall, including differences in the length and  
276 orientation of PG [60]. Short glycan chain lengths may increase the flexibility of the PG  
277 sacculus [24, 55], which may permit folding of the cellular envelope.



278 Cardiolipin, a non-bilayer anionic phospholipid, generates a large curvature and tends to be  
279 concentrated at the division septum and poles of bacteria, and is also enriched in the highly-  
280 invaginated inner membrane of mitochondria [61, 62]. Cardiolipin is thought to be inserted  
281 into the inner membrane leaflet, where it can bind to proteins. Cardiolipin has roles in  
282 controlling membrane fluidity, lipid bilayer remodeling, and deformation. But cardiolipin  
283 is ubiquitous in bacteria and VLFs are rare.

284 Recent work has shown that outer membrane vesiculation can be mediated by curvature-  
285 inducing proteins [63]. While periplasmic turgor pressure can provide for outer membrane  
286 blebbing, as in Fig. S3, it seems unlikely that an external force would supply the mechanical  
287 force needed to induce envelope infolding to form VLFs. Vesiculation in the formation of  
288 chromatophores of purple bacterium *Rhodobacter sphaeroides* is thought to be driven by  
289 CM lipid synthesis and remodeling, but these vesicles do not contain PG [64]. It is hard to  
290 imagine that lipid enrichment alone could be responsible for making large symmetrical PG-  
291 containing vesicles capable of completely detaching from the envelope.

## 292 ***Ca. T. nelsonii* has the genetic potential for endocytosis-like VLF** 293 **formation**

294 Eukaryotic endocytosis is not a passive process whereby lipid dynamics alone drive vesicle  
295 formation, reviewed by [65-67]. These mechanisms in eukaryotes are far too diverse and  
296 often not sufficiently-well understood to fully discuss herein, but key steps include: 1)  
297 *localized changes in membrane fluidity and tension involving both lipids and membrane*  
298 *scaffolding proteins; 2) actin or dynamins pinching off large vesicles from the envelope; 3)*

299 *regulation of these processes by small GTPases*. Importantly, homologues of genes  
300 involved with endocytosis are known to occur in bacteria, reviewed by [68].

301

302 The dynamics of alterations of the membrane tension and fluidity in clathrin-independent  
303 endocytosis are not well understood, particularly the importance of different drivers. In  
304 general, membrane fluidity can be increased by packing the membrane with lipids such as  
305 phosphatidylserine, which increases the charge density. In *Ca. T. nelsonii* this may involve  
306 varying ratios of the long-tail fatty acids, phospholipids, and cardiolipin. To elucidate the  
307 role of membrane lipids in vesicle formation, an examination of the KEGG maps [69] for  
308 the biosynthesis of glycerophospholipids revealed *Ca. T. nelsonii* lacks the genetic  
309 potential to make choline and inositol phospholipids. Instead, they may make  
310 phosphatidylserines, phosphatidylethanolamines, and phosphatidylglycerols (although the  
311 final enzymatic phosphatase is missing, other genes of similar function can occur, e.g.  
312 [70]).

313

314 In eukaryotes, membrane tension resulting from lipid rafting is mediated by cholesterol  
315 and sphingolipids, and perhaps scaffolding proteins such as flotillin [71]. Lipid rafting was  
316 until recently thought to be restricted to the eukaryotes, but more recently it has also been  
317 demonstrated in model bacterial strains, reviewed by [72-74]. Bacterial lipid rafting may  
318 be mediated by sterols or other isoprenoids such as hopanoids and carotenoids, cardiolipin,  
319 and bacterial homologues to flotillin. The steroid and terpenoid biosynthesis KEGG maps  
320 revealed the genetic potential to synthesize cardiolipin, squalene, terpenoids, and perhaps

321 sterols. *Ca. T. nelsonii* possesses two *orfs* encoding squalene synthases, two sterol  
322 desaturases/sphingolipid hydroxylases, and multiple *orfs* encoding putative sterols. Indeed,  
323 not all sterol synthesis genes are known [75] and new or alternative ones are regularly being  
324 discovered, e.g.[76]). The sterol identified in sister marine vacuolated taxon *Ca.*  
325 *Marithioploca* was cyclolaudenol, a C<sub>31</sub> sterol which is found in a few plants and has not  
326 been reported in other bacteria nor in the marine environment [77]. We also found 1 flotillin  
327 and 13-14 flotillin-like *orfs*, including bacterial membrane scaffolding genes *hicCKX* [78].  
328 The role of flotillins in endocytosis is currently under debate [65, 66]. In bacteria, flotillins  
329 have been shown to be in microdomains where they play a role in protein secretion, signal  
330 transduction, and transport. In *Bacillus subtilis*, the flotillin-like protein YdjI has recently  
331 been shown to be key to localization of the inner-membrane remodeler phage shock protein  
332 A, for which there are two *orfs* in *Ca. T. nelsonii* genomes [79].

333 There are many pathways for endocytosis that rely on the activities of actin, reviewed by  
334 [66]. For the sake of brevity, we focused our attention on the two mechanisms that can  
335 generate vesicles greater than 0.5  $\mu\text{m}$  in size in eukaryotes, namely macropinocytosis and  
336 phagocytosis. In macropinocytosis, actin is responsible for making the vesicular cup via  
337 ruffling the plasma membrane [80]. Initially, a circular region rich in less-viscous lipids  
338 and containing a small signaling GTPase forms in the plasma membrane. Actin then  
339 polymerizes around the patch of fluid membrane, forming a ring capable of constriction.  
340 Macropinocytosis is unique among the types of actin-driven endocytosis because it does  
341 not always require dynamin to pinch off the vesicle, whereas phagocytosis does [81].  
342 Another major difference between the two processes is that initiation of macropinocytosis  
343 is typically mediated by growth factors, whereas phagocytosis is mediated by external

344 particle recognition. In both cases, aspects of formation, maturation and regulation of these  
345 envelope-derived intracellular vesicles are not fully understood.

346 A bacterial actin, MamK, has been implicated in intracellular vesicle formation to form  
347 magnetosomes in magnetotactic bacteria [82, 83] and a *mamK*-like *orf* has been previously  
348 identified in other Beggiatoaceae [23]. We found a *mamK* homologue in three of the *Ca.*  
349 *Thiomargarita* genomes. In some *Ca. T. nelsonii* genomes, the actin homologue *mamK*  
350 directly neighbors a flotillin-like homologue (pfam01145 Band 7). We also identified many  
351 *orfs* that contain uncharacterized heat shock protein 70 (hsp70) domains that belong to the  
352 actin superfamily. Hsp70 chaperone proteins are known to insert in negatively charged  
353 lipid-containing membranes (e.g. cardiolipin) and play a role in endocytosis among many  
354 other functions [84, 85], including membrane remodeling [86-88]. The hsp70 domain-  
355 containing *orfs* were particularly prevalent in the genome of the *Ca. T. nelsonii* strain from  
356 methane seeps that attaches to substrates, elongates, and buds new cells at the terminal end  
357 [5, 14]. With the exception of *dnaK* and *hscAC*, other actin homologues (e.g. *parM* [89])  
358 were not found.

359 Dynamins are large GTPases that assemble into helical polymers that wrap around  
360 membrane tubes and contract upon GTPase activity. A bacterial dynamin was recently  
361 found to mediate membrane remodeling *in vitro* [90, 91], including membrane fusion.  
362 Dynamins have also been shown to stabilize FtsZ [92] and in some cases, also interact with  
363 a flotillin [93]. We found up to three dynamin-family protein encoding *orfs* in the *Ca. T.*  
364 *nelsonii* genomes. Thus, homologues of the key agents for completing vesicle formation in  
365 eukaryotic phagocytosis, actin and dynamin, are found in *Ca. T. nelsonii* genomes.

366 In both macropinocytosis and phagocytosis, a small Ras superfamily GTPase, pfam00071,  
367 regulates the actin. A Ras domain gene (pfam00071) occurs in all *Ca. T. nelsonii* genomes,  
368 where it resides on a possible operon containing a gene for ribosomal large subunit  
369 pseudouridine synthase B, a putative outer membrane/PG-binding encoding gene, and an  
370 *orf* of unknown function. In *Ca. T. nelsonii* Bud S10, from a Hydrate Ridge methane seep  
371 [14], this potential operon is adjacent to predicted genes for PG and *ftsZ*. Genes coding for  
372 proteins assigned to the Ras superfamily GTPase (pfam00071) appear to be uncommon in  
373 bacteria (361 of >7800 species in the pfam database) and archaea (38 of >300 species), but  
374 common in eukaryotes (989 of >1500 species). We also identified another small GTPase,  
375 pfam08477 and pfam16095, tentatively identified as “Roco” or “Rup” group ATPases [94].  
376 This small GTPase is also uncommon in bacteria (177 species) and archaea (1 species) and  
377 is thought to be homologous to eukaryotic Ras proteins. In addition, we identified other  
378 potential small GTPases that could potentially function in cytoskeletal remodeling.

### 379 ***Ca. T. nelsonii* also has bacterial homologues to other eukaryotic**

### 380 **cytoskeletal proteins**

381 The genomes of *Ca. T. nelsonii* contain *orfs* encoding homologues for the cytoskeletal  
382 proteins tubulin [89, 95, 96] and intermediate filaments (IFs). Homologues of  $\alpha$ -tubulin  
383 and  $\beta$ -tubulin were previously identified in sister taxa *Beggiatoa* sp. SS [96], but were not  
384 found in *Ca. T. nelsonii*. Instead, the tubulin homologue was of the *ftsZII* family  
385 (pfam13809), which has been hypothesized to be involved with membrane remodeling  
386 [95]. Intermediate filaments (IF) differ from actins and tubulins in that they are more  
387 deformable and elastic [97]. They self-assemble and do not bind a nucleoside triphosphate.

388 The structural composition of IFs is highly variable, but a coil-coil domain is essential for  
389 monomers to assemble laterally. Homologues to the heteropolymer-forming IFs ZicK and  
390 ZacK, recently discovered in the cyanobacterium *Anabaena* spp. [98], are also present in  
391 the *Ca. T. nelsonii* genomes. In *Anabaena* spp., ZicK and ZacK interact with MreB and  
392 cyanobacterial proteins SepJ [33, 99] and SepI [34], which are not found in *Ca. T. nelsonii*  
393 genomes. In *Anabaena* sp. PCC 7120 the heteropolymers span the length of the cell,  
394 longitudinal to the division septum, and are likely anchored to the poles. They contribute  
395 cell shape but not division. The model strain for colorless sulfur bacteria, *Allochromatium*  
396 *vinosum*, possesses an IF-like protein associated with sulfur globules, SgpG [100].  
397 Homologues were not detected in *Ca. T. nelsonii*'s genomes nor did we find homologues  
398 to other known bacterial IFs [101-115]. The homopolymer bactofilin, CcmA (pfam04519),  
399 an alternative to IFs in bacteria [116], has been found broadly across bacteria and is present  
400 in *Ca. T. nelsonii* genomes. We speculate that tubulin or IFs or both may play some role in  
401 VLF formation.

402 **Is intracellular PG-bound vesicle formation unique to the *Ca.***  
403 ***Thiomargarita* spp. and possibly the Beggiatoaceae?**

404 Recently, a strain of Planctomycetes, *Ca. Uab amorphum*, was found to be capable of both  
405 locomotion and phagocytosis similar to that of some amoeba [117]. The authors attributed  
406 the behaviors to a eukaryotic or archaeal-like actin and demonstrated actin-like fibrous  
407 regions within the cell via TEM. We have not observed such structures in *Ca.*  
408 *Thiomargarita* spp. during our TEM investigations even though *Ca. T. nelsonii* possess an

409 actin homologue. But presumably, phagocytosis by this strain of Planctomycetes involved  
410 deformation of the PG sacculus.

411 The surgeonfish gut symbiont, *Epulopiscium spp.*, can approach the size of *Ca.*  
412 *Thiomargarita spp.*. A member of the Clostridiales, *Epulopiscium* is unusual in that its  
413 envelope lacks a thick PG layer and it can produce multiple endospores. Furthermore, some  
414 cells have extensive and broken invaginations of the inner membrane that contain  
415 numerous nucleoids [118, 119]. This dense network of fibrous and membranous materials  
416 may function similar to a cell wall in providing structure [118] and may facilitate transport,  
417 overcoming limitations of diffusion for a large cell [120]. The function and molecular  
418 composition of this network is currently unknown [121]. The largest morphotype of  
419 *Epulopiscium* also possess a zone of “coated” vesicles hypothesized to be similar to  
420 eukaryotic clathrin-coated vesicles and excretionary in nature [118]. Unfortunately, the  
421 mechanism(s) for forming these intracellular vesicles is not known, nor are there suitable  
422 genomes to interrogate. The electron-dense VLFs in *Ca. Thiomargarita spp.* have a  
423 roughly similar appearance to vesicles observed within the cortex of the *Epulopiscium*,  
424 except that the VLFs in *Ca. Thiomargarita spp.* are primarily spherical, whereas  
425 *Epulopiscium* contains a layer of small spherical vesicles superjacent to a zone of  
426 irregularly-shaped vesicle-like features with electron dense boundaries [118]. The  
427 similarity in appearance between the VLFs in *Ca. Thiomargarita spp.* and *Epulopiscium*  
428 suggests the possibility that vesicles in *Epulopiscium* may also be bounded by PG and that  
429 PG-bounded VLFs may be a common feature of giant bacteria.

## 430 **Conclusion**

431 This report represents an accumulation of data collected over of six years on *Ca.*  
432 *Thiomargarita* spp. from Namibian upwelling sediments. Their large size may be facilitated  
433 by the lack of the canonical cell division pathway. More importantly, we have learned that  
434 these extraordinarily large bacteria have the potential to bring the outside milieu inside  
435 their cells, as in eukaryotic endocytosis. However, the thick sheath and S-layer(s) of the  
436 envelope likely prevent most large particles and microorganisms from being drawn into  
437 the VLFs. We posit that one potential role of VLFs may be related to sequestering sulfur  
438 and other storage granules from the cytoplasm and from other vacuolar contents, although  
439 most vesicles do not contain inclusions. In particular, redox intermediates of sulfur  
440 oxidation, such as thiols [122], can react with reactive species generated by denitrification  
441 [123], which are found at high concentration in the *Ca. T.* central vacuole. Furthermore, in  
442 a sister taxon to *Ca. Thiomargarita* spp., *Ca. Allobeggiatoa halophila*, the central vacuole  
443 contains active electron transport chains that maintain the acidity of the vacuole by proton  
444 motive force while conserving cellular energy [124]. Thus, the VLFs in *Ca. Thiomargarita*  
445 spp., may function like cells within a cell, where cellular regulation and activity is localized  
446 and depends on the VLF's internal content. DAPI staining indicates that DNA is associated  
447 with the vesicles, suggesting the possibility of locally-regulated gene expression. Such  
448 “nodes” of electron transport chain-mediated phosphorylation may prove beneficial in  
449 powering such a large cell. A third potential benefit to forming VLFs is to increase “surface  
450 to volume” ratios such that there is an increased number of energy-producing reaction  
451 centers to fuel the cell, as for thylakoids and chromatophores. Finally, another possible  
452 function of the VLFs may be to recycle outer membrane constituents, which would not  
453 otherwise be possible. Regardless of their metabolic function(s), the dynamic remodeling



454 of the cell ultrastructure required to produce these features extends the boundaries of  
455 typical bacterial cell wall plasticity, adding to the growing list of unique features possessed  
456 by the largest of all bacteria.

## 457 **Methods**

### 458 **Sample collection.**

459 *Ca. Thiomargarita* spp. were collected using a multi-corer on board the R/V *Mirabilis*.  
460 Cores were taken from organic-rich sediments on the Atlantic shelf, near Walvis Bay,  
461 Namibia (23°00.009' 14°04.117') on yearly expeditions from 2016-2019. All cells used in  
462 the experiments were collected from a depth of 1-3 cm depth beneath the sediment/water  
463 interface. *Ca. Thiomargarita* sp. cells were stored in their host sediments with overlying  
464 core-top water in closed 50 ml centrifuge tubes at 4°C and protected from direct light in  
465 advance of labeling experiments and TEM observations. For experimentation, individual  
466 chains of *Ca. Thiomargarita* spp. are separated from their host sediment in sterilized Instant  
467 Ocean® in a 35 mm sterile petri dish via pipet while observing them on an Olympus SZX-  
468 16 stereomicroscope.

### 469 **Peptidoglycan labeling.**

470 *Ca. Thiomargarita* cells were incubated in the incubation medium described in [15] or in  
471 sterilized Instant Ocean®, along with 1 mM fluorescently-labeled amino acids and 1%  
472 dimethyl sulfoxide to improve the solubilization of the FDAAs [17]. The FDAA used in  
473 these experiments was BADA (4,4-Difluoro-5,7-Dimethyl-4-Bora-3a,4a-Diaza-s-

474 Indacene-3-Propionic Acid-3-amino-D-alanine) EX 503 nm; EM 512 nm) Color  
475 Green/FITC [17, 22]. The cells were incubated in the FDAA media for 15 minutes to 1  
476 hour in a sterile glass bottom petri dish prior to imaging. The cells in figure 1B-C were  
477 imaged using an Olympus IX-81 inverted microscope equipped with a long working  
478 distance (WD 2.7-4.0) 40x objective (NA-0.6), a DP73 camera and CellSens Dimension  
479 (Olympus, Japan). Other light microscope stacks were collected using a Nikon TiE inverted  
480 microscope equipped with an A1Rsi confocal scan head and lasers (405, 488, 561, 640 nm)  
481 with 20x (NA-0.75, WD 1.0), 40x (NA-0.6, WD 0.14 mm), and 60x (NA-1.27, WD  
482 0.27mm) objectives. Image acquisition and maximum intensity projections were  
483 performed using Nikon NIS-Elements v. 5.1 software. Note: the large size of the cells  
484 precludes true super resolution microscopy. Many of the FDAA experiments were imaged  
485 on a Zeiss Axio Observer SD spinning disk confocal with 10x (NA-0.30, WD 3.2), 40x  
486 (NA-0.75, WD 0.71), 63X (NA-1.2, WD 0.28) and 63X (NA-1.4, WD 0.19) objectives  
487 with a 488 nm laser. Images were captured using Zen 2 2.0 software. Adjustments to  
488 brightness and contrast of confocal stacks was performed in Fiji [125] and of slices/stills  
489 in Photoshop. 3D rendering, surface reconstruction, and movie generation for Video 3 were  
490 done with Imaris 9.5 (Bitplane). To confirm the types of observations in cellular structure  
491 observed during FDAA labeling, additional cells were labeled with WGA with an Alexa  
492 Fluor™ 488 conjugate (Life Technologies) and DAPI.

### 493 **Co-staining of thin sections for vesicle constituents.**

494 Approximately 100 *Ca. Thiomargarita* spp. chains were pooled and fixed with 2%  
495 paraformaldehyde in cold PBS with 6.8% sucrose overnight. The cells were dehydrated

496 using a very slow dehydration series with cold ethanol, and the final step using pure ethanol  
497 was repeated in triplicate. Then the dehydrated cells were embedded in Technovit® 8100  
498 (Kulzer Technique) and sectioned on a Leica EM UC6 Ultramicrotome producing slices 5  
499 µm in thickness. Individual slices were subjected to different staining procedures. The  
500 outer membrane was stained first using polymyxin B labeled with horseradish peroxidase,  
501 a 1:50 dilution and incubated overnight [126]. The slides were then wash in PBS wash  
502 buffer for 15 minutes and incubated with Alexa Fluor™ 488 Tyramide at 1:100 dilution  
503 for 1 hour. Then the slides were washed with both a PBS wash, and H2O wash before  
504 counterstaining with FM 4-64 for all lipids. Alternatively, thin sections were stained with  
505 DAPI. Image analyses as above on an Olympus BX61 equipped with a UPlanFL N - 100X  
506 objective - 1.30 NA Oil Ph3 running CellSens V1.18.

## 507 **Transmission electron microscopy method #1.**

508 Since, *Ca. Thiomargarita* spp. are essentially a hollow aqueous vacuole for much of the  
509 total cell volume, we chose to perform longer fixation steps than typically employed for  
510 bacteria. Pooled chains of *Ca. Thiomargarita* spp. cells were fixed in 2% paraformaldehyde  
511 in 3.5% NaCl for 24 hours and then were suspended in 2.5% glutaraldehyde, 1M HEPES  
512 (4-(2-hydroxyethyl)-1-piperazineethanesulfonic acid) and 3.5% NaCl for two days. Then  
513 the cells were washed in Instant Ocean® three times and were then resuspended in 2%  
514 OsO<sub>4</sub> and 3.5% NaCl for two hours. Cells were then washed in HEPES and suspended in  
515 1% uranyl acetate in 3.5% NaCl for one hour followed by another wash series. Cells were  
516 then dehydrated through a graded ethanol series (25%, 50%, 75%, 95% and 100% x 3) and  
517 were resuspended in a 50:50 mixture of LR White Resin and anhydrous ethanol at 4°C.

518 After an overnight incubation, the cells were then resuspended in 100% LR White Resin  
519 for one hour prior to being placed in gelatin capsules filled with LR White Resin and  
520 incubated for one hour at 60°C for polymerization. 40 nm thin sections generated by a  
521 Reichert UltraCut S Ultramicrotome. The sections were post-stained with 2% uranyl  
522 acetate prior to imaging on a Tecnai™ G2 Spirit BioTWIN transmission electron  
523 microscope at an operating voltage of 120 kV. Images were acquired with an Eagle 4  
524 megapixel CCD camera.

## 525 **Transmission electron microscopy method #2.**

526 Chains of *Ca. Thiomargarita* spp. were transferred three times into petri dishes containing  
527 filter-sterilized Instant Ocean, pH 7.8, to remove external debris. Then the chains were  
528 pooled and transferred into a 1.5 mL centrifuge tube containing 0.1M cacodylate buffer  
529 (pH: 7.4), 2.5% glutaraldehyde, and 2% paraformaldehyde with 5% dimethyl sulfoxide  
530 (DMSO) for 15 minutes. The chains were subsequently transferred to fresh buffer and  
531 fixative three additional times with 15 minutes intervals to remove residual salts and then  
532 were stored at 4°C for 3 hours. The pooled chains were then transferred to the same fixative  
533 solution but without DMSO for two weeks and then were shipped to Ohio State University  
534 Campus Microscopy & Imaging Facility for processing and imaging. Individual chains of  
535 *Ca. Thiomargarita* spp. were transferred to an aqueous room temperature solution of 1%  
536 osmium tetroxide and were placed in a Pelco Biowave microwave tissue processing system  
537 under vacuum (20" Hg). Each chain was microwaved for two minutes three times with  
538 two minutes of rest in-between and then were cooled in an ice bath if the temperature  
539 appeared above 27°C. The microwave processing and cooling was repeated two additional

540 times but with only two rounds of microwaving in each series. Then the chains of cells  
541 were dehydrated in a graded ethanol series within the microwave at 150 W power. Room  
542 temperature 50%, 70%, and 90% ethanol solutions were prepared in sodium acetate to  
543 achieve an osmolarity equivalent to seawater (1.16 osmole/L) and an ~100% ethanol  
544 solution was prepared in sodium acetate at an osmolarity of 0.1 osmole/L. Microwave times  
545 of 40 seconds each were employed for each increasing concentration of ethanol with the  
546 final dehydration step of ~100% ethanol repeated a second time. The chains were  
547 infiltrated with freshly made low viscosity Spurr's resin in the microwave under vacuum  
548 at 200 W. In 5 minutes rounds, the chains were infiltrated with a 1:1 solution of  
549 acetone:resin, then by 100% resin for two consecutive rounds followed by cooling at room  
550 temperature before a final microwave step with 100% resin. The samples were kept under  
551 vacuum for 72 hours and then were transferred to a BEEM capsule containing 100%  
552 Spurr's resin for polymerization in an oven at 65°C for 24 hours. Ultrathin sections were  
553 cut by a Leica EM UC6 ultramicrotome and collected on a copper grid. Reynold's lead  
554 citrate and 2% uranyl acetate was utilized for post en bloc staining. Images were acquired  
555 with an FEI Technai G2 Spirit transmission electron microscope (FEI), and Macrofire  
556 (Optronics) digital camera and AMT image capture software.

## 557 **Metagenomics and genome analyses.**

558 Two *Ca. T. nelsonii* chains from marine station 23020 sediments stored at 4°C were  
559 individually rinsed in sterile seawater and then transferred to UV-treated PBS.  
560 TruePrime™ Single Cell Whole Genome Amplification kit (Sygnis) [127] was used to  
561 amplify the genomes of *Ca. Thiomargarita* spp. and their microbiomes. Both samples were

562 incubated in 1,4-dithiothreitol for 5 minutes at 25°C followed by 1 minutes at 95°C and  
563 then the manufacturer's instructions were followed. All of the reagents, disposables and  
564 equipment were cleaned with DNA-OFF™ (Takara Bio, Inc.) and/or UV sterilized as  
565 appropriate [128] prior to amplification. Illumina DNA sequencing libraries were  
566 generated using a TruSeq DNA Nano library kit and then the samples were multiplexed  
567 with 13 other samples on four lanes of a HiSeq 2500 high output flow cells running v4  
568 chemistry. The resulting number of raw 125x2 reads (550 bps insert) for Sample 1 (aka.  
569 ENDO3) was 17,854,737 total paired end reads and for Sample 2 (aka. ENDO5) was  
570 40,206,931 total paired end reads. Residual adapters and phiX were removed with BBDuk  
571 version 36.64 [129]. Khmer version 2.0+713.g54c7de6 [130] was then employed to  
572 remove low abundance k-mers and PrinSeq-lite 0.20.4 [131] removed low complexity  
573 reads and duplicate reads. Both metagenomes were assembled with (meta-)SPAdes-3.10.0  
574 using the k-mers 21,33,55,77 [132]. Genome binning was performed using MyCC using  
575 penta-nucleotides and palindromes of hexa-nucleotides [133] on contigs greater than 2000  
576 bps. Complete metagenome assemblies and *Ca. T. nelsonii* bins were submitted to IMG/ER  
577 [134] for annotation. Genes of interest were queried against the National Center for  
578 Biotechnology Information non-redundant protein sequences database via Blastp with  
579 default setting to search for potential associated homologues and examined conserved  
580 domain gene regions.

581 **Data availability.** Both the metagenomes (Ga0216254, Ga0216256) and *Ca. T. nelsonii*  
582 bins (Ga0309624, Ga0259525) are available at IMG/M. The fastq files are available at  
583 <https://conservancy.umn.edu/handle/11299/208858>.

## 584 **Acknowledgements**

585 We would like to thank contributions made by the late Dr. Chibo Chikwililwa, Professor  
586 Kurt Hanselmann, Dr. Deon C. Louw, Richard Horaeb, Bronwen Currie, the crew of the  
587 R/V Mirabalis, the National Marine Information and Research Centre of the Namibia  
588 Ministry of Fisheries and Marine Resources, and the staff and students of Regional  
589 Graduate Networks in Oceanography (RGNO) Discovery Camp, and the Marine and  
590 Coastal Resources Research Center at the University of Namibia. Also Dr. Jeff Gralnick,  
591 Ruth Lee and Dr. Yves Brun for their thoughtful insights. This work was made possible by  
592 the skilled staff and resources of the University of Minnesota's Imaging Center, the UMN  
593 Characterization Facility and Genomics Center as well as Ohio State University Center for  
594 Electron Microscopy and Analysis and the Campus Microscopy and Imaging Facility. In  
595 particular, we thank the formidable research staff Dr. Guillermo Marques, Dr. Jeffrey R.  
596 Tonniges and Dr. Giovanna Grandinetti who had to think out of the box to work with very  
597 difficult samples. This work was funded by National Science Foundation (1935351)  
598 awarded to J.V.B, B.E.F and R.H. and the Simons Foundation Early Career Investigator  
599 award (341838), an Alfred P. Sloan Foundation Research Fellowship (BR2014-048) and a  
600 McKnight Land Grant Fellowship all awarded to J.V.B. NIH Grant (GM113172) supported  
601 the development of the FDAAs. Field sampling was made possible by the RGNO  
602 Discovery Camp, which is funded by the Scientific Committee for Oceanographic  
603 Research and the Agouron Institute.

#### 604 Contributions

605 B.E.F., J.V.B. and D.J.L. contributed to experimental design. J.V.B., and D.J.L, acquired  
606 the samples. M.V.N. provided FDAAs and advice on how to use them. B.E.F., J.V.B.,  
607 D.J.L. and N.D. performed the FDAA experiments. B.E.F. and J.V.B. conducted the WGA

608 experiments. B.E.F., D.J.L. and J.V.B performed thin section experiments. D.J.L., B.E.F.,  
609 J.V.B. and R.C.H. performed preparation of TEM samples. R.C.H., B.E.F., and J.V.B.  
610 performed TEM analyses. N.D. performed the whole genome amplification.  
611 Bioinformatics and genome analysis were by B.E.F with input from B.M. B.E.F. wrote the  
612 manuscript with input from all authors.

## 613 **References**

- 614 1. Mußmann M, Hu F, Richter M, de Beer D, Preisler A, Jørgensen B, et al. Insights  
615 into the genome of large sulfur bacteria revealed by analysis of single filaments.  
616 PLOS Biol. 2007;5(9):1923-37.
- 617 2. Flood B, Bailey J, Biddle J. Horizontal gene transfer and the rock record:  
618 comparative genomics of phylogenetically distant bacteria that induce wrinkle  
619 structure formation in modern sediments. Geobiology. 2014.
- 620 3. MacGregor BJ, Biddle JF, Teskea A. Mobile elements in a single-filament Orange  
621 Guaymas Basin *Beggiatoa* (“*Candidatus* Maribeggiatoa”) sp. draft genome:  
622 Evidence for genetic exchange with Cyanobacteria. Appl Environ Microb.  
623 2013;79(13):3974–85.
- 624 4. Salman V, Bailey JV, Teske A. Phylogenetic and morphologic complexity of giant  
625 sulphur bacteria. Antonie Leeuwenhoek. 2013;104(2):169-86. Epub 2013/06/25.  
626 doi: 10.1007/s10482-013-9952-y. PubMed PMID: 23793621.
- 627 5. Bailey JV, Salman V, Rouse GW, Schulz-Vogt HN, Levin LA, Orphan VJ.  
628 Dimorphism in methane seep-dwelling ecotypes of the largest known bacteria.



- 629 ISME J. 2011;5(12):1926-35. Epub 2011/06/24. doi: 10.1038/ismej.2011.66.  
630 PubMed PMID: 21697959; PubMed Central PMCID: PMCPMC3223306.
- 631 6. Salman V, Amann R, Girth A-C, Polerecky L, Bailey JV, Høgslund S, et al. A  
632 single-cell sequencing approach to the classification of large, vacuolated sulfur  
633 bacteria. *Syst Appl Microbiol.* 2011;34(4):243-59. Epub 2011/04/19. doi:  
634 10.1016/j.syapm.2011.02.001. PubMed PMID: 21498017.
- 635 7. Schulz HN, Brinkhoff T, Ferdelman TG, Marine MH, Teske A, Jørgensen BB.  
636 Dense populations of a giant sulfur bacterium in Namibian shelf sediments.  
637 *Science.* 1999;284(5413):493-5. Epub 1999/04/16. doi:  
638 10.1126/science.284.5413.493. PubMed PMID: 10205058.
- 639 8. Schulz HN. The Genus *Thiomargarita*. *The Prokaryotes* 2006. p. 1156-63.
- 640 9. Kamp A, Høgslund S, Risgaard-Petersen N, Stief P. Nitrate Storage and  
641 Dissimilatory Nitrate Reduction by Eukaryotic Microbes. *Front Microbiol.*  
642 2015;6:1492. Epub 2016/01/07. doi: 10.3389/fmicb.2015.01492. PubMed PMID:  
643 26734001; PubMed Central PMCID: PMCPMC4686598.
- 644 10. Teske A, Salman V. The Family Beggiatoaceae. *The Prokaryotes* Berlin  
645 Heidelberg: Springer-Verlag 2014. p. 93-134.
- 646 11. Schulz HN, de Beer D. Uptake rates of oxygen and sulfide measured with  
647 individual *Thiomargarita namibiensis* cells by using microelectrodes. *Appl*  
648 *Environ Microb.* 2002;68(11):5746-9.
- 649 12. Kalanetra KM, Huston SL, Nelson DC. Novel, attached, sulfur-oxidizing bacteria  
650 at shallow hydrothermal vents possess vacuoles not involved in respiratory nitrate  
651 accumulation. *Appl Environ Microb.* 2004;70(12):7487-96.

- 652 13. Winkel M, Carvalho V, Woyke T, Richter M, Schulz-Vogt HN, Flood B, et al.  
653 Single-cell sequencing of *Thiomargarita* reveals genomic flexibility for adaptation  
654 to dynamic redox conditions. *Front Microbiol.* 2016;7:964. Epub 2016/07/23. doi:  
655 10.3389/fmicb.2016.00964. PubMed PMID: 27446006; PubMed Central PMCID:  
656 PMC4914600.
- 657 14. Flood BE, Fliss P, Jones DS, Dick GJ, Jain S, Kaster A-K, et al. Single-cell (meta-  
658 )genomics of a dimorphic *Candidatus Thiomargarita nelsonii* reveals genomic  
659 plasticity. *Front Microbiol.* 2016;7:603. Epub 2016/05/21. doi:  
660 10.3389/fmicb.2016.00603. PubMed PMID: 27199933; PubMed Central PMCID:  
661 PMC4853749.
- 662 15. Bailey JV, Flood BE, Ricci E, Delherbe N. Imaging of cellular oxidoreductase  
663 activity suggests mixotrophic metabolisms in *Thiomargarita* spp. *mBio.*  
664 2017;8(6):e01263-17. Epub 2017/11/09. doi: 10.1128/mBio.01263-17. PubMed  
665 PMID: 29114021; PubMed Central PMCID: PMC5676036.
- 666 16. Schulz HN, Schulz HD. Large sulfur bacteria and the formation of phosphorite.  
667 *Nature.* 2005;307(5708):416-8. Epub 2005/01/22. doi: 10.1126/science.1103096.  
668 PubMed PMID: 15662012.
- 669 17. Kuru E, Tekkam S, Hall E, Brun YV, Van Nieuwenhze MS. Synthesis of  
670 fluorescent D-amino acids and their use for probing peptidoglycan synthesis and  
671 bacterial growth in situ. *Nature protocols.* 2015;10(1):33-52.
- 672 18. Kuru E, Hughes HV, Brown PJ, Hall E, Tekkam S, Cava F, et al. In situ probing of  
673 newly synthesized peptidoglycan in live bacteria with fluorescent D - amino acids.  
674 *Angew Chem Int Edit.* 2012;51(50):12519-23. Epub 2012/10/12. doi:

- 675 10.1002/anie.201206749. PubMed PMID: 23055266; PubMed Central PMCID:  
676 PMCPMC3589519.
- 677 19. Radkov AD, Hsu Y-P, Booher G, VanNieuwenhze MS. Imaging Bacterial Cell  
678 Wall Biosynthesis. *Annual Review of Biochemistry*. 2018;87(1):991-1014. Epub  
679 2018/03/30. doi: 10.1146/annurev-biochem-062917-012921. PubMed PMID:  
680 29596002; PubMed Central PMCID: PMCPMC6287495.
- 681 20. Lovering AL, Safadi SS, Strynadka NC. Structural perspective of peptidoglycan  
682 biosynthesis and assembly. *Annu Rev Biochem*. 2012;81:451-78. Epub  
683 2012/06/06. doi: 10.1146/annurev-biochem-061809-112742. PubMed PMID:  
684 22663080.
- 685 21. Typas A, Banzhaf M, Gross CA, Vollmer W. From the regulation of peptidoglycan  
686 synthesis to bacterial growth and morphology. *Nat Rev Microbiol*. 2012;10:123-  
687 36.
- 688 22. Hsu YP, Rittichier J, Kuru E, Yablonowski J, Pasciak E, Tekkam S, et al. Full color  
689 palette of fluorescent d-amino acids for in situ labeling of bacterial cell walls. *Chem*  
690 *Sci*. 2017;8(9):6313-21. Epub 2017/10/11. doi: 10.1039/c7sc01800b. PubMed  
691 PMID: 28989665; PubMed Central PMCID: PMCPMC5628581.
- 692 23. MacGregor BJ, Flood B, Bailey J, Kanke M. Multiplication is vexation: A genomic  
693 perspective on cell division and DNA replication in the large sulfur bacteria. In:  
694 Kallmeyer J, editor. *Life at Vents and Seeps*. 5: Walter de Gruyter GmbH & Co  
695 KG; 2017.
- 696 24. de Pedro MA, Cava F. Structural constraints and dynamics of bacterial cell wall  
697 architecture. *Front Microbiol*. 2015;6:449. Epub 2015/05/26. doi:

- 698 10.3389/fmicb.2015.00449. PubMed PMID: 26005443; PubMed Central PMCID:  
699 PMCPMC4424881.
- 700 25. Petiti M, Serrano B, Faure L, Lloubes R, Mignot T, Duche D. Tol Energy-Driven  
701 Localization of Pal and Anchoring to the Peptidoglycan Promote Outer-Membrane  
702 Constriction. *J Mol Biol.* 2019;431(17):3275-88. Epub 2019/06/04. doi:  
703 10.1016/j.jmb.2019.05.039. PubMed PMID: 31153904.
- 704 26. Sun J, Rutherford ST, Silhavy TJ, Huang KC. Physical properties of the bacterial  
705 outer membrane. *Nat Rev Microbiol.* 2021. Epub 20211103. doi: 10.1038/s41579-  
706 021-00638-0. PubMed PMID: 34732874.
- 707 27. Liu X, Biboy J, Consoli E, Vollmer W, den Blaauwen T. MreC and MreD balance  
708 the interaction between the elongasome proteins PBP2 and RodA. *PLoS Genet.*  
709 2020;16(12):e1009276. Epub 20201228. doi: 10.1371/journal.pgen.1009276.  
710 PubMed PMID: 33370261; PubMed Central PMCID: PMCPMC7793260.
- 711 28. Flood BE, Louw DC, Van der Plas AK, Bailey JV. Giant sulfur bacteria  
712 (Beggiatoaceae) from sediments underlying the Benguela upwelling system host  
713 diverse microbiomes. *PLoS One.* 2021;16(11):e0258124. Epub 20211124. doi:  
714 10.1371/journal.pone.0258124. PubMed PMID: 34818329; PubMed Central  
715 PMCID: PMCPMC8612568.
- 716 29. Diekmann Y, Pereira-Leal JB. Evolution of intracellular compartmentalization.  
717 *Biochem J.* 2013;449(2):319-31. Epub 2012/12/18. doi: 10.1042/BJ20120957.  
718 PubMed PMID: 23240612.
- 719 30. Cornejo E, Abreu N, Komeili A. Compartmentalization and organelle formation in  
720 bacteria. *Curr Opin Cell Biol.* 2014;26:132-8. Epub 2014/01/21. doi:

- 721 10.1016/j.ceb.2013.12.007. PubMed PMID: 24440431; PubMed Central PMCID:  
722 PMCPMC4318566.
- 723 31. Flechsler J, Heimerl T, Huber H, Rachel R, Berg IA. Functional  
724 compartmentalization and metabolic separation in a prokaryotic cell. *Proc Natl*  
725 *Acad Sci U S A*. 2021;118(25). Epub 2021/06/24. doi: 10.1073/pnas.2022114118.  
726 PubMed PMID: 34161262; PubMed Central PMCID: PMCPMC8237620.
- 727 32. Zhang JY, Lin GM, Xing WY, Zhang CC. Diversity of Growth Patterns Probed in  
728 Live Cyanobacterial Cells Using a Fluorescent Analog of a Peptidoglycan  
729 Precursor. *Front Microbiol*. 2018;9:791. Epub 20180424. doi:  
730 10.3389/fmicb.2018.00791. PubMed PMID: 29740419; PubMed Central PMCID:  
731 PMCPMC5928242.
- 732 33. Mariscal V, Nurnberg DJ, Herrero A, Mullineaux CW, Flores E. Overexpression  
733 of SepJ alters septal morphology and heterocyst pattern regulated by diffusible  
734 signals in *Anabaena*. *Mol Microbiol*. 2016;101(6):968-81. Epub 2016/06/09. doi:  
735 10.1111/mmi.13436. PubMed PMID: 27273832.
- 736 34. Springstein BL, Arévalo S, Helbig AO, Herrero A, Stucken K, Flores E, et al. A  
737 novel septal protein of multicellular heterocystous cyanobacteria is associated with  
738 the divisome. *Mol Microbiol*. 2020;113(6):1140-54. Epub 20200224. doi:  
739 10.1111/mmi.14483. PubMed PMID: 32039534.
- 740 35. Springstein BL, Weissenbach J, Koch R, Stucker F, Stucken K. The role of the  
741 cytoskeletal proteins MreB and FtsZ in multicellular cyanobacteria. *FEBS Open*  
742 *Bio*. 2020;10(12):2510-31. Epub 20201113. doi: 10.1002/2211-5463.13016.  
743 PubMed PMID: 33112491; PubMed Central PMCID: PMCPMC7714070.

- 744 36. Lin T-Y, Gross WS, Auer GK, Weibel DB. Cardiolipin alters *Rhodobacter*  
745 *sphaeroides* cell shape by affecting peptidoglycan precursor biosynthesis. *mBio*.  
746 2019;10(1):e02401-18.
- 747 37. Kuru E, Lambert C, Rittichier J, Till R, Ducret A, Derouaux A, et al. Fluorescent  
748 D-amino-acids reveal bi-cellular cell wall modifications important for *Bdellovibrio*  
749 *bacteriovorus* predation. *Nat Microbiol*. 2017;2(12):1648-57. Epub 2017/10/05.  
750 doi: 10.1038/s41564-017-0029-y. PubMed PMID: 28974693; PubMed Central  
751 PMCID: PMC5705579.
- 752 38. Yague P, Willemsse J, Koning RI, Rioseras B, Lopez-Garcia MT, Gonzalez-  
753 Quinonez N, et al. Subcompartmentalization by cross-membranes during early  
754 growth of *Streptomyces* hyphae. *Nat Commun*. 2016;7:12467. Epub 20160812.  
755 doi: 10.1038/ncomms12467. PubMed PMID: 27514833; PubMed Central PMCID:  
756 PMC4990651.
- 757 39. Zhang H, Mulholland GA, Seef S, Zhu S, Liu J, Mignot T, et al. Establishing rod  
758 shape from spherical, peptidoglycan-deficient bacterial spores. *Proc Natl Acad Sci*  
759 *U S A*. 2020;117(25):14444-52. Epub 20200608. doi: 10.1073/pnas.2001384117.  
760 PubMed PMID: 32513721; PubMed Central PMCID: PMC7321990.
- 761 40. Cserti E, Roskopf S, Chang YW, Eischeuer S, Selter L, Shi J, et al. Dynamics of  
762 the peptidoglycan biosynthetic machinery in the stalked budding bacterium  
763 *Hyphomonas neptunium*. *Mol Microbiol*. 2017;103(5):875-95. Epub 20170119.  
764 doi: 10.1111/mmi.13593. PubMed PMID: 27997718.

- 765 41. Maier S, Murray R. The fine structure of *Thioploca ingrlica* and a comparison with  
766 *Beggiatoa*. *Can J Microbiol.* 1965;11(4):645-55. Epub 1965/08/01. doi:  
767 10.1139/m65-087. PubMed PMID: 5861285.
- 768 42. Strohl WR, Larkin JM. Enumeration, isolation, and characterization of *Beggiatoa*  
769 from freshwater sediments. *Appl Environ Microb.* 1978;36(5):755-70. Epub  
770 1978/11/01. doi: 10.1128/AEM.36.5.755-770.1978. PubMed PMID: 16345330;  
771 PubMed Central PMCID: PMCPMC243134.
- 772 43. Strohl WR, Geffers I, Larkin JM. Structure of the sulfur inclusion envelopes from  
773 four *Beggiatoas*. *Curr Microbiol.* 1981;6(2):75-9.
- 774 44. Strohl WR, Howard KS, Larkin JM. Ultrastructure of *Beggiatoa alba* strain B15LD.  
775 *Microbiol.* 1982;128(1):73-84.
- 776 45. Williams TM, Unz RF, Doman JT. Ultrastructure of *Thiothrix* spp. and “type  
777 021N” bacteria. *Appl Environ Microb.* 1987;53(7):1560-70.
- 778 46. Nelson DC, Wirsén CO, Jannasch HW. Characterization of large, autotrophic  
779 *Beggiatoa* spp. abundant at hydrothermal vents of the Guaymas Basin. *Appl*  
780 *Environ Microb.* 1989;55(11):2909-17.
- 781 47. Maier S, Völker H, Beese M, Gallardo VA. The fine structure of *Thioploca araucae*  
782 and *Thioploca chileae*. *Can J Microbiol.* 1990;36(6):438-48.
- 783 48. Larkin JM, Henk MC, Burton SD. Occurrence of a *Thiothrix* sp. attached to mayfly  
784 larvae and presence of parasitic bacteria in the *Thiothrix* sp. *Appl Environ Microb.*  
785 1990;56(2):357-61. Epub 1990/02/01. doi: 10.1128/AEM.56.2.357-361.1990.  
786 PubMed PMID: 16348112; PubMed Central PMCID: PMCPMC183344.

- 787 49. Larkin J, Henk MC. Filamentous Sulfide-Oxidizing Bacteria at Hydrocarbon Seeps  
788 of the Gulf of Mexico. *Microscopy Research and Technique*. 1996;33:23-31.
- 789 50. de Albuquerque JP, Keim CN, Lins U. Comparative analysis of *Beggiatoa* from  
790 hypersaline and marine environments. *Micron*. 2010;41(5):507-17. Epub  
791 2010/03/09. doi: 10.1016/j.micron.2010.01.009. PubMed PMID: 20207153.
- 792 51. Bland JA, Staley J. Observations on the biology of *Thiothrix*. *Arch Micro*.  
793 1978;117(1):79-87.
- 794 52. Strohl WR, Larkin JM. Cell division and trichome breakage in *Beggiatoa*. *Curr*  
795 *Microbiol*. 1978;1(3):151-5. Epub 1978/01/01. doi: 10.1007/BF02601668.  
796 PubMed PMID: 23338140.
- 797 53. Pilhofer M, Ladinsky MS, McDowall AW, Jensen GJ. Bacterial TEM: new insights  
798 from cryo-microscopy. *Methods in Cell Biology*. 96: Elsevier; 2010. p. 21-45.
- 799 54. Maki JS. Bacterial intracellular sulfur globules: structure and function. *J Mol*  
800 *Microbiol Biotechnol*. 2013;23(4-5):270-80. Epub 2013/08/08. doi:  
801 10.1159/000351335. PubMed PMID: 23920490.
- 802 55. Schwechheimer C, Kuehn MJ. Outer-membrane vesicles from Gram-negative  
803 bacteria: biogenesis and functions. *Nat Rev Microbiol*. 2015;13(10):605-19. Epub  
804 2015/09/17. doi: 10.1038/nrmicro3525. PubMed PMID: 26373371; PubMed  
805 Central PMCID: PMC5308417.
- 806 56. Kulp A, Kuehn MJ. Biological functions and biogenesis of secreted bacterial outer  
807 membrane vesicles. *Annu Rev Microbiol*. 2010;64:163-84. Epub 2010/09/10. doi:  
808 10.1146/annurev.micro.091208.073413. PubMed PMID: 20825345; PubMed  
809 Central PMCID: PMC3525469.



- 810 57. Briers Y, Staubli T, Schmid MC, Wagner M, Schuppler M, Loessner MJ.  
811 Intracellular vesicles as reproduction elements in cell wall-deficient L-form  
812 bacteria. *PLoS One*. 2012;7(6):e38514. Epub 2012/06/16. doi:  
813 10.1371/journal.pone.0038514. PubMed PMID: 22701656; PubMed Central  
814 PMCID: PMCPMC3368840.
- 815 58. Studer P, Staubli T, Wieser N, Wolf P, Schuppler M, Loessner MJ. Proliferation of  
816 *Listeria monocytogenes* L-form cells by formation of internal and external vesicles.  
817 *Nat Commun*. 2016;7:13631. Epub 2016/11/24. doi: 10.1038/ncomms13631.  
818 PubMed PMID: 27876798; PubMed Central PMCID: PMCPMC5123018.
- 819 59. Kaparakis M, Turnbull L, Carneiro L, Firth S, Coleman HA, Parkington HC, et al.  
820 Bacterial membrane vesicles deliver peptidoglycan to NOD1 in epithelial cells.  
821 *Cell Microbiol*. 2010;12(3):372-85. Epub 2009/11/06. doi: 10.1111/j.1462-  
822 5822.2009.01404.x. PubMed PMID: 19888989.
- 823 60. Turner RD, Mesnage S, Hobbs JK, Foster SJ. Molecular imaging of glycan chains  
824 couples cell-wall polysaccharide architecture to bacterial cell morphology. *Nat*  
825 *Commun*. 2018;9(1):1263. Epub 2018/03/30. doi: 10.1038/s41467-018-03551-y.  
826 PubMed PMID: 29593214; PubMed Central PMCID: PMCPMC5871751.
- 827 61. Lin TY, Weibel DB. Organization and function of anionic phospholipids in  
828 bacteria. *Appl Microbiol Biotechnol*. 2016;100(10):4255-67. Epub 2016/03/31.  
829 doi: 10.1007/s00253-016-7468-x. PubMed PMID: 27026177.
- 830 62. Unsay JD, Cosentino K, Subburaj Y, Garcia-Saez AJ. Cardiolipin effects on  
831 membrane structure and dynamics. *Langmuir*. 2013;29(51):15878-87. Epub  
832 2013/08/22. doi: 10.1021/la402669z. PubMed PMID: 23962277.

- 833 63. Bohuszewicz O, Liu J, Low HH. Membrane remodelling in bacteria. *J Struct Biol.*  
834 2016;196(1):3-14. Epub 2016/06/07. doi: 10.1016/j.jsb.2016.05.010. PubMed  
835 PMID: 27265614; PubMed Central PMCID: PMC6168058.
- 836 64. Noble JM, Lubieniecki J, Savitzky BH, Plitzko J, Engelhardt H, Baumeister W, et  
837 al. Connectivity of centermost chromatophores in *Rhodobacter sphaeroides*  
838 bacteria. *Mol Microbiol.* 2018;109(6):812-25. Epub 2018/07/12. doi:  
839 10.1111/mmi.14077. PubMed PMID: 29995992.
- 840 65. Sandvig K, Kavaliauskiene S, Skotland T. Clathrin-independent endocytosis: an  
841 increasing degree of complexity. *Histochem Cell Biol.* 2018;150(2):107-18. Epub  
842 2018/05/19. doi: 10.1007/s00418-018-1678-5. PubMed PMID: 29774430; PubMed  
843 Central PMCID: PMC6096564.
- 844 66. Thottacherry JJ, Sathe M, Prabhakara C, Mayor S. Spoiled for Choice: Diverse  
845 Endocytic Pathways Function at the Cell Surface. *Annu Rev Cell Dev Biol.*  
846 2019;35:55-84. Epub 2019/07/10. doi: 10.1146/annurev-cellbio-100617-062710.  
847 PubMed PMID: 31283376; PubMed Central PMCID: PMC6917507.
- 848 67. Doherty GJ, McMahon HT. Mechanisms of endocytosis. *Annu Rev Biochem.*  
849 2009;78:857-902. Epub 2009/03/26. doi:  
850 10.1146/annurev.biochem.78.081307.110540. PubMed PMID: 19317650.
- 851 68. Vega-Cabrera LA, Pardo-Lopez L. Membrane remodeling and organization:  
852 Elements common to prokaryotes and eukaryotes. *IUBMB Life.* 2017;69(2):55-62.  
853 Epub 2017/01/24. doi: 10.1002/iub.1604. PubMed PMID: 28111926.

- 854 69. Kanehisa M, Furumichi M, Sato Y, Ishiguro-Watanabe M, Tanabe M. KEGG:  
855 integrating viruses and cellular organisms. *Nucleic Acids Research*.  
856 2021;49(D1):D545-D51.
- 857 70. Wu F, Yang Z, Kuang T. Impaired photosynthesis in phosphatidylglycerol-  
858 deficient mutant of cyanobacterium *Anabaena* sp. PCC7120 with a disrupted gene  
859 encoding a putative phosphatidylglycerophosphatase. *Plant Physiol*.  
860 2006;141(4):1274-83. Epub 2006/07/04. doi: 10.1104/pp.106.083451. PubMed  
861 PMID: 16815953; PubMed Central PMCID: PMC1533927.
- 862 71. Morrow IC, Parton RG. Flotillins and the PHB domain protein family: rafts, worms  
863 and anaesthetics. *Traffic*. 2005;6(9):725-40. Epub 2005/08/17. doi:  
864 10.1111/j.1600-0854.2005.00318.x. PubMed PMID: 16101677.
- 865 72. Wagner RM, Kricks L, Lopez D. Functional Membrane Microdomains Organize  
866 Signaling Networks in Bacteria. *J Membrane Biol*. 2017;250(4):367-78. Epub  
867 2016/08/28. doi: 10.1007/s00232-016-9923-0. PubMed PMID: 27566471.
- 868 73. Lopez D, Koch G. Exploring functional membrane microdomains in bacteria: an  
869 overview. *Curr Opin Microbiol*. 2017;36:76-84. Epub 2017/02/27. doi:  
870 10.1016/j.mib.2017.02.001. PubMed PMID: 28237903; PubMed Central PMCID:  
871 PMC1533927.
- 872 74. Bramkamp M, Lopez D. Exploring the existence of lipid rafts in bacteria. *Microbiol*  
873 *Mol Biol Rev*. 2015;79(1):81-100.
- 874 75. Wei JH, Yin X, Welander PV. Sterol Synthesis in Diverse Bacteria. *Front*  
875 *Microbiol*. 2016;7:990. Epub 2016/07/23. doi: 10.3389/fmicb.2016.00990.  
876 PubMed PMID: 27446030; PubMed Central PMCID: PMC1533927.

- 877 76. Pollier J, Vancaester E, Kuzhiumparambil U, Vickers CE, Vandepoele K, Goossens  
878 A, et al. A widespread alternative squalene epoxidase participates in eukaryote  
879 steroid biosynthesis. *Nat Microbiol.* 2019;4(2):226-33. Epub 2018/11/28. doi:  
880 10.1038/s41564-018-0305-5. PubMed PMID: 30478288.
- 881 77. McCaffrey MA, Farrington JW, Repeta DJ. Geochemical implications of the lipid  
882 composition of *Thioploca* spp. from the Peru upwelling region—15 S. *Org*  
883 *Geochem.* 1989;14(1):61-8.
- 884 78. Toledo A, Huang Z, Coleman JL, London E, Benach JL. Lipid rafts can form in the  
885 inner and outer membranes of *Borrelia burgdorferi* and have different properties  
886 and associated proteins. *Mol Microbiol.* 2018;108(1):63-76. Epub 2018/01/30. doi:  
887 10.1111/mmi.13914. PubMed PMID: 29377398; PubMed Central PMCID:  
888 PMC5867248.
- 889 79. Scholz AS, Baur SSM, Wolf D, Bramkamp M. An Stomatin, Prohibitin, Flotillin,  
890 and HflK/C-Domain Protein Required to Link the Phage-Shock Protein to the  
891 Membrane in *Bacillus subtilis*. *Front Microbiol.* 2021;12:754924. Epub 20211028.  
892 doi: 10.3389/fmicb.2021.754924. PubMed PMID: 34777311; PubMed Central  
893 PMCID: PMC8581546.
- 894 80. Lim JP, Gleeson PA. Macropinocytosis: an endocytic pathway for internalising  
895 large gulps. *Immunol Cell Biol.* 2011;89(8):836-43. Epub 20110322. doi:  
896 10.1038/icb.2011.20. PubMed PMID: 21423264.
- 897 81. Rosales C, Uribe-Querol E. Phagocytosis: A Fundamental Process in Immunity.  
898 *Biomed Res Int.* 2017;2017:9042851. Epub 20170612. doi:

- 899 10.1155/2017/9042851. PubMed PMID: 28691037; PubMed Central PMCID:  
900 PMCPMC5485277.
- 901 82. Rioux JB, Philippe N, Pereira S, Pignol D, Wu LF, Ginet N. A second actin-like  
902 MamK protein in *Magnetospirillum magneticum* AMB-1 encoded outside the  
903 genomic magnetosome island. *PLoS One*. 2010;5(2):e9151. Epub 2010/02/18. doi:  
904 10.1371/journal.pone.0009151. PubMed PMID: 20161777; PubMed Central  
905 PMCID: PMCPMC2818848.
- 906 83. Komeili A, Li Z, Newman DK, Jensen GJ. Magnetosomes are cell membrane  
907 invaginations organized by the actin-like protein MamK. *Science*.  
908 2006;311(5758):242-5.
- 909 84. De Maio A, Hightower L. The interaction of heat shock proteins with cellular  
910 membranes: a historical perspective. *Cell Stress Chaperon*. 2021;26(5):769-83.  
911 Epub 20210903. doi: 10.1007/s12192-021-01228-y. PubMed PMID: 34478113;  
912 PubMed Central PMCID: PMCPMC8413713.
- 913 85. Mayer MP. The Hsp70-Chaperone Machines in Bacteria. *Front Mol Biosci*.  
914 2021;8:694012. Epub 20210607. doi: 10.3389/fmolb.2021.694012. PubMed  
915 PMID: 34164436; PubMed Central PMCID: PMCPMC8215388.
- 916 86. Mahalka AK, Kirkegaard T, Jukola LT, Jaattela M, Kinnunen PK. Human heat  
917 shock protein 70 (Hsp70) as a peripheral membrane protein. *Biochim Biophys*  
918 *Acta*. 2014;1838(5):1344-61. Epub 20140128. doi:  
919 10.1016/j.bbamem.2014.01.022. PubMed PMID: 24480410.
- 920 87. Armijo G, Okerblom J, Cauvi DM, Lopez V, Schlamadinger DE, Kim J, et al.  
921 Interaction of heat shock protein 70 with membranes depends on the lipid

- 922 environment. *Cell Stress Chaperon*. 2014;19(6):877-86. Epub 20140501. doi:  
923 10.1007/s12192-014-0511-x. PubMed PMID: 24789271; PubMed Central  
924 PMCID: PMCPMC4389847.
- 925 88. Jilly R, Khan NZ, Aronsson H, Schneider D. Dynamin-Like Proteins Are  
926 Potentially Involved in Membrane Dynamics within Chloroplasts and  
927 Cyanobacteria. *Front Plant Sci*. 2018;9:206. Epub 2018/03/10. doi:  
928 10.3389/fpls.2018.00206. PubMed PMID: 29520287; PubMed Central PMCID:  
929 PMCPMC5827413.
- 930 89. Wagstaff J, Löwe J. Prokaryotic cytoskeletons: protein filaments organizing small  
931 cells. *Nat Rev Microbiol*. 2018;16(4):187-201. Epub 2018/01/23. doi:  
932 10.1038/nrmicro.2017.153. PubMed PMID: 29355854.
- 933 90. Liu J, Noel JK, Low HH. Structural basis for membrane tethering by a bacterial  
934 dynamin-like pair. *Nat Commun*. 2018;9(1):3345. Epub 2018/08/23. doi:  
935 10.1038/s41467-018-05523-8. PubMed PMID: 30131557; PubMed Central  
936 PMCID: PMCPMC6104087.
- 937 91. Guo L, Bramkamp M. Bacterial dynamin-like protein DynA mediates lipid and  
938 content mixing. *FASEB J*. 2019;33(11):11746-57. Epub 2019/07/31. doi:  
939 10.1096/fj.201900844RR. PubMed PMID: 31361971; PubMed Central PMCID:  
940 PMCPMC6902734.
- 941 92. Schlimpert S, Wasserstrom S, Chandra G, Bibb MJ, Findlay KC, Flardh K, et al.  
942 Two dynamin-like proteins stabilize FtsZ rings during *Streptomyces* sporulation.  
943 *Proc Natl Acad Sci U S A*. 2017;114(30):E6176-E83. Epub 2017/07/09. doi:

- 944 10.1073/pnas.1704612114. PubMed PMID: 28687675; PubMed Central PMCID:  
945 PMC5544309.
- 946 93. Dempwolff F, Wischhusen HM, Specht M, Graumann PL. The deletion of bacterial  
947 dynamin and flotillin genes results in pleiotrophic effects on cell division, cell  
948 growth and in cell shape maintenance. *BMC Microbiol.* 2012;12(1):1-12.
- 949 94. Wuichet K, Sogaard-Andersen L. Evolution and diversity of the Ras superfamily  
950 of small GTPases in prokaryotes. *Genome Biol Evol.* 2014;7(1):57-70. Epub  
951 2014/12/07. doi: 10.1093/gbe/evu264. PubMed PMID: 25480683; PubMed Central  
952 PMCID: PMC4316618.
- 953 95. Makarova KS, Koonin EV. Two new families of the FtsZ-tubulin protein  
954 superfamily implicated in membrane remodeling in diverse bacteria and archaea.  
955 *Biology direct.* 2010;5(1):1-9.
- 956 96. Yutin N, Koonin EV. Archaeal origin of tubulin. *Biology Direct.* 2012;7(1):1-9.
- 957 97. Etienne-Manneville S. Cytoplasmic intermediate filaments in cell biology. *Annu*  
958 *Rev Cell Dev Bi.* 2018;34:1-28.
- 959 98. Springstein BL, Nurnberg DJ, Woehle C, Weissenbach J, Theune ML, Helbig AO,  
960 et al. Two novel heteropolymer-forming proteins maintain the multicellular shape  
961 of the cyanobacterium *Anabaena* sp. PCC 7120. *FEBS J.* 2021;288(10):3197-216.  
962 Epub 20201210. doi: 10.1111/febs.15630. PubMed PMID: 33205554.
- 963 99. Ramos-Leon F, Mariscal V, Frias JE, Flores E, Herrero A. Divisome-dependent  
964 subcellular localization of cell-cell joining protein SepJ in the filamentous  
965 cyanobacterium *Anabaena*. *Mol Microbiol.* 2015;96(3):566-80. Epub 2015/02/04.  
966 doi: 10.1111/mmi.12956. PubMed PMID: 25644579.

- 967 100. Weissgerber T, Sylvester M, Kröniger L, Dahl C. A comparative quantitative  
968 proteomic study identifies new proteins relevant for sulfur oxidation in the purple  
969 sulfur bacterium *Allochromatium vinosum*. *Appl Environ Microbiol*.  
970 2014;80(7):2279-92. Epub 2014/02/04. doi: 10.1128/AEM.04182-13. PubMed  
971 PMID: 24487535; PubMed Central PMCID: PMC3993150.
- 972 101. Ausmees N, Kuhn JR, Jacobs-Wagner C. The bacterial cytoskeleton: an  
973 intermediate filament-like function in cell shape. *Cell*. 2003;115(6):705-13.
- 974 102. Springstein BL, Woehle C, Weissenbach J, Helbig AO, Dagan T, Stucken K.  
975 Identification and characterization of novel filament-forming proteins in  
976 cyanobacteria. *Sci Rep*. 2020;10(1):1894. Epub 2020/02/07. doi: 10.1038/s41598-  
977 020-58726-9. PubMed PMID: 32024928; PubMed Central PMCID:  
978 PMC7002697.
- 979 103. Pfeiffer D, Toro-Nahuelpan M, Awal RP, Muller FD, Bramkamp M, Plitzko JM, et  
980 al. A bacterial cytolinker couples positioning of magnetic organelles to cell shape  
981 control. *Proc Natl Acad Sci U S A*. 2020;117(50):32086-97. Epub 2020/12/02. doi:  
982 10.1073/pnas.2014659117. PubMed PMID: 33257551; PubMed Central PMCID:  
983 PMC7749328.
- 984 104. Grangeon R, Zupan JR, Anderson-Furgeson J, Zambryski PC. PopZ identifies the  
985 new pole, and PodJ identifies the old pole during polar growth in *Agrobacterium*  
986 *tumefaciens*. *Proc Natl Acad Sci U S A*. 2015;112(37):11666-71. Epub 20150831.  
987 doi: 10.1073/pnas.1515544112. PubMed PMID: 26324921; PubMed Central  
988 PMCID: PMC4577194.



- 989 105. Huitema E, Pritchard S, Matteson D, Radhakrishnan SK, Viollier PH. Bacterial  
990 birth scar proteins mark future flagellum assembly site. *Cell*. 2006;124(5):1025-37.  
991 doi: 10.1016/j.cell.2006.01.019. PubMed PMID: 16530048.
- 992 106. Holmes NA, Walshaw J, Leggett RM, Thibessard A, Dalton KA, Gillespie MD, et  
993 al. Coiled-coil protein Scy is a key component of a multiprotein assembly  
994 controlling polarized growth in *Streptomyces*. *Proc Natl Acad Sci U S A*.  
995 2013;110(5):E397-406. Epub 2013/01/09. doi: 10.1073/pnas.1210657110.  
996 PubMed PMID: 23297235; PubMed Central PMCID: PMC3562780.
- 997 107. Walshaw J, Gillespie MD, Kelemen GH. A novel coiled-coil repeat variant in a  
998 class of bacterial cytoskeletal proteins. *J Struct Biol*. 2010;170(2):202-15. Epub  
999 20100221. doi: 10.1016/j.jsb.2010.02.008. PubMed PMID: 20178847.
- 1000 108. Zupan J, Guo Z, Biddle T, Zambryski P. *Agrobacterium tumefaciens* Growth Pole  
1001 Ring Protein: C Terminus and Internal Apolipoprotein Homologous Domains Are  
1002 Essential for Function and Subcellular Localization. *mBio*. 2021;12(3). Epub  
1003 20210518. doi: 10.1128/mBio.00764-21. PubMed PMID: 34006657; PubMed  
1004 Central PMCID: PMC8262873.
- 1005 109. Springstein BL, Nurnberg DJ, Weiss GL, Pilhofer M, Stucken K. Structural  
1006 Determinants and Their Role in Cyanobacterial Morphogenesis. *Life (Basel)*.  
1007 2020;10(12). Epub 20201217. doi: 10.3390/life10120355. PubMed PMID:  
1008 33348886; PubMed Central PMCID: PMC7766704.
- 1009 110. Specht M, Schatzle S, Graumann PL, Waidner B. *Helicobacter pylori* possesses  
1010 four coiled-coil-rich proteins that form extended filamentous structures and control  
1011 cell shape and motility. *J Bacteriol*. 2011;193(17):4523-30. Epub 20110603. doi:

- 1012 10.1128/JB.00231-11. PubMed PMID: 21642462; PubMed Central PMCID:  
1013 PMCPMC3165534.
- 1014 111. Waidner B, Specht M, Dempwolff F, Haebeler K, Schaetzle S, Speth V, et al. A  
1015 novel system of cytoskeletal elements in the human pathogen *Helicobacter pylori*.  
1016 PLoS Pathog. 2009;5(11):e1000669. Epub 20091120. doi:  
1017 10.1371/journal.ppat.1000669. PubMed PMID: 19936218; PubMed Central  
1018 PMCID: PMCPMC2776988.
- 1019 112. Fiuza M, Letek M, Leiba J, Villadangos AF, Vaquera J, Zanella-Cleon I, et al.  
1020 Phosphorylation of a novel cytoskeletal protein (RsmP) regulates rod-shaped  
1021 morphology in *Corynebacterium glutamicum*. J Biol Chem. 2010;285(38):29387-  
1022 97. Epub 20100709. doi: 10.1074/jbc.M110.154427. PubMed PMID: 20622015;  
1023 PubMed Central PMCID: PMCPMC2937971.
- 1024 113. Mignot T, Shaevitz JW, Hartzell PL, Zusman DR. Evidence that focal adhesion  
1025 complexes power bacterial gliding motility. Science. 2007;315(5813):853-6. doi:  
1026 10.1126/science.1137223. PubMed PMID: 17289998; PubMed Central PMCID:  
1027 PMCPMC4095873.
- 1028 114. Ward MJ, Lew H, Zusman DR. Social motility in *Myxococcus xanthus* requires  
1029 FrzS, a protein with an extensive coiled - coil domain. Mol Microbiol.  
1030 2000;37(6):1357-71.
- 1031 115. Martin NR, Blackman E, Bratton BP, Chase KJ, Bartlett TM, Gitai Z. CrvA and  
1032 CrvB form a curvature-inducing module sufficient to induce cell-shape complexity  
1033 in Gram-negative bacteria. Nat Microbiol. 2021;6(7):910-20. Epub 20210628. doi:

- 1034 10.1038/s41564-021-00924-w. PubMed PMID: 34183815; PubMed Central  
1035 PMCID: PMCPMC8764749.
- 1036 116. Kuhn J, Briegel A, Morschel E, Kahnt J, Leser K, Wick S, et al. Bactofilins, a  
1037 ubiquitous class of cytoskeletal proteins mediating polar localization of a cell wall  
1038 synthase in *Caulobacter crescentus*. *EMBO J.* 2010;29(2):327-39. Epub 20091203.  
1039 doi: 10.1038/emboj.2009.358. PubMed PMID: 19959992; PubMed Central  
1040 PMCID: PMCPMC2824468.
- 1041 117. Shiratori T, Suzuki S, Kakizawa Y, Ishida KI. Phagocytosis-like cell engulfment  
1042 by a planctomycete bacterium. *Nat Commun.* 2019;10(1):5529. Epub 2019/12/13.  
1043 doi: 10.1038/s41467-019-13499-2. PubMed PMID: 31827088; PubMed Central  
1044 PMCID: PMCPMC6906331.
- 1045 118. Robinow C, Angert ER. Nucleoids and coated vesicles of “*Epulopiscium*” spp.  
1046 *Arch Micro.* 1998;170(4):227-35. Epub 1998/09/11. doi: 10.1007/s002030050637.  
1047 PubMed PMID: 9732436.
- 1048 119. Linn MW, Pollak PE. *Epulopiscium fishelsoni* NG, N. Sp., a Protist of Uncertain  
1049 Taxonomic Affinities from the Gut of an Herbivorous Reef Fish 1. *J Protozool.*  
1050 1988;35(4):565-9.
- 1051 120. Clements K, Bullivant S. An unusual symbiont from the gut of surgeonfishes may  
1052 be the largest known prokaryote. *J Bacteriol.* 1991;173(17):5359-62.
- 1053 121. Hutchison E, Yager NA, Taw MN, Taylor M, Arroyo F, Sannino DR, et al.  
1054 Developmental stage influences chromosome segregation patterns and arrangement  
1055 in the extremely polyploid, giant bacterium *Epulopiscium* sp. type B. *Mol*

- 1056 Microbiol. 2018;107(1):68-80. Epub 2017/10/13. doi: 10.1111/mmi.13860.  
1057 PubMed PMID: 29024073.
- 1058 122. Dahl C. Cytoplasmic sulfur trafficking in sulfur-oxidizing prokaryotes. IUBMB  
1059 Life. 2015;67(4):268-74. Epub 2015/04/29. doi: 10.1002/iub.1371. PubMed PMID:  
1060 25913822.
- 1061 123. Bowman LA, McLean S, Poole RK, Fukuto JM. The diversity of microbial  
1062 responses to nitric oxide and agents of nitrosative stress: close cousins but not  
1063 identical twins. Adv Microb Physiol. 59: Elsevier; 2011. p. 135-219.
- 1064 124. Beutler M, Milucka J, Hinck S, Schreiber F, Brock J, Mußmann M, et al. Vacuolar  
1065 respiration of nitrate coupled to energy conservation in filamentous Beggiatoaceae.  
1066 Environ Microbiol. 2012;14(11):2911-9. Epub 2012/08/29. doi: 10.1111/j.1462-  
1067 2920.2012.02851.x. PubMed PMID: 22925165.
- 1068 125. Rasband WS. ImageJ, U. S. National Institutes of Health, Bethesda, Maryland,  
1069 <https://imagej.nih.gov/ij/> <https://imagej.nih.gov/ij/>: U. S. National Institutes of  
1070 Health, Bethesda, Maryland,; 1997-2018.
- 1071 126. Appelmek BJ, Su D, Verweij-van Vught AMJ, Thijs BG, MacLaren DM.  
1072 Polymyxin B-horseradish peroxidase conjugates as tools in endotoxin research.  
1073 Anal Biochem. 1992;207(2):311-6.
- 1074 127. Picher AJ, Budeus B, Wafzig O, Kruger C, Garcia-Gomez S, Martinez-Jimenez  
1075 MI, et al. TruePrime is a novel method for whole-genome amplification from single  
1076 cells based on TthPrimPol. Nat Commun. 2016;7:13296. Epub 2016/11/30. doi:  
1077 10.1038/ncomms13296. PubMed PMID: 27897270; PubMed Central PMCID:  
1078 PMCPMC5141293 reported findings. A.J.P., B.B., D.W., O.W., A.S. and C.K. are

1079 or were employees of SYGNIS Biotech SLU/SYGNIS Bioscience GmbH & Co  
1080 KG. L.B. owns shares of SYGNIS A.G. and is a paid advisor to the company.  
1081 TruePrime is a commercial product line available through SYGNIS or its  
1082 distributors. The remaining authors declare no competing financial interests.

1083 128. Woyke T, Szczyrba A, Lee J, Rinke C, Tighe D, Clingenpeel S, et al.  
1084 Decontamination of MDA reagents for single cell whole genome amplification.  
1085 PLOS ONE. 2011;6(10):e26161. Epub 2011/10/27. doi:  
1086 10.1371/journal.pone.0026161. PubMed PMID: 22028825; PubMed Central  
1087 PMCID: PMCPMC3197606.

1088 129. Bushnell B. BBTools software package. URL  
1089 <http://sourcefor genet/projects/bbmap>. 2014.

1090 130. Crusoe MR, Alameldin HF, Awad S, Boucher E, Caldwell A, Cartwright R, et al.  
1091 The khmer software package: enabling efficient nucleotide sequence analysis.  
1092 F1000Res. 2015;4:900. Epub 2015/11/05. doi: 10.12688/f1000research.6924.1.  
1093 PubMed PMID: 26535114; PubMed Central PMCID: PMCPMC4608353.

1094 131. Schmieder R, Edwards R. Quality control and preprocessing of metagenomic  
1095 datasets. Bioinformatics. 2011;27(6):863-4. Epub 2011/02/01. doi:  
1096 10.1093/bioinformatics/btr026. PubMed PMID: 21278185; PubMed Central  
1097 PMCID: PMCPMC3051327.

1098 132. Nurk S, Meleshko D, Korobeynikov A, Pevzner PA. metaSPAdes: a new versatile  
1099 metagenomic assembler. Genome Res. 2017;27(5):824-34. Epub 2017/03/17. doi:  
1100 10.1101/gr.213959.116. PubMed PMID: 28298430; PubMed Central PMCID:  
1101 PMCPMC5411777.

- 1102 133. Lin H-H, Liao Y-C. Accurate binning of metagenomic contigs via automated  
1103 clustering sequences using information of genomic signatures and marker genes.  
1104 Scientific Reports. 2016;6(1):24175. Epub 2016/04/14. doi: 10.1038/srep24175.  
1105 PubMed PMID: 27067514; PubMed Central PMCID: PMC4828714.
- 1106 134. Chen I-MA, Chu K, Palaniappan K, Pillay M, Ratner A, Huang J, et al. IMG/M v.  
1107 5.0: an integrated data management and comparative analysis system for microbial  
1108 genomes and microbiomes. Nucleic acids research. 2018;47(D1):D666-D77.

1109 **Supporting information**

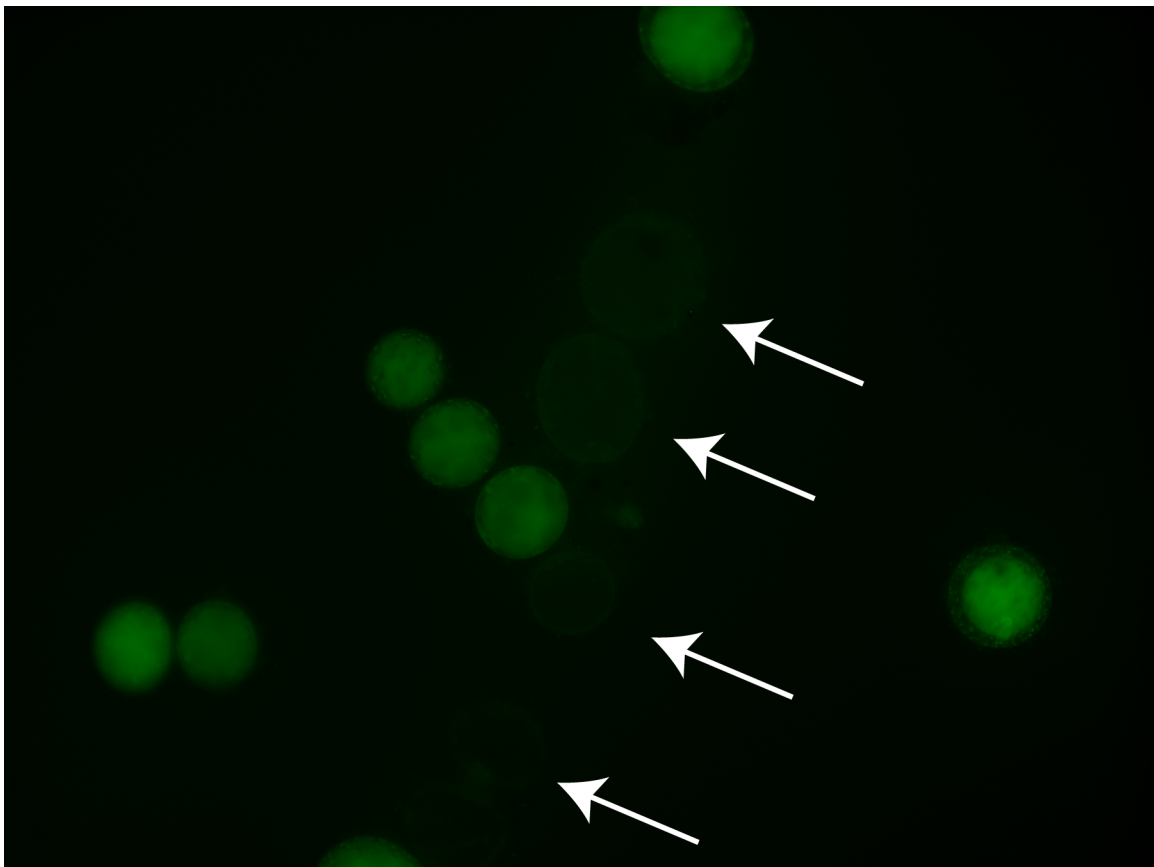

1110

1111 **S1 Fig. Evidence that FDAAs do not nonspecifically bind cellular material. *Ca.***  
1112 *Thiomargarita* sp. Incubated for 1 week with FDAAs. Dead cells, arrows, do not  
1113 incorporate the FDAAs.

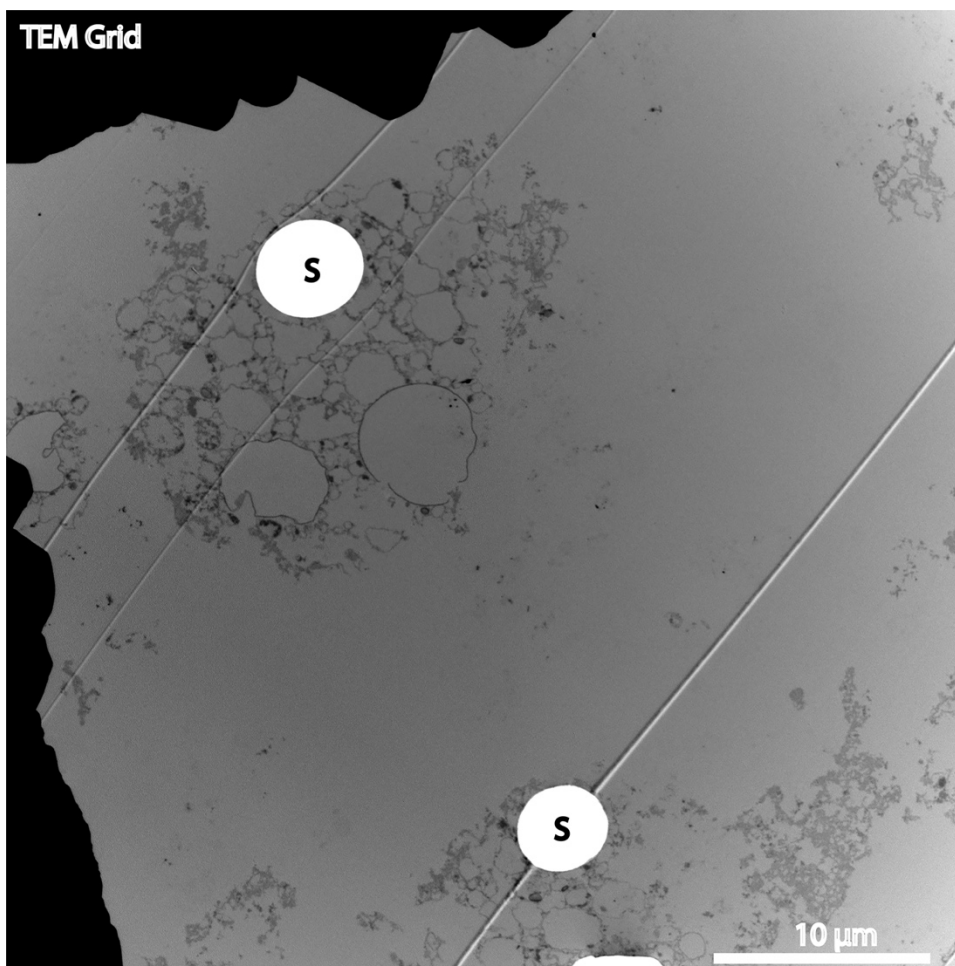

1115 **S2 Fig. Transmission electron microscope micrograph of clusters of VLFs in *Ca.***  
1116 ***Thiomargarita* spp..** As depicted here, some clusters of VLFs can become detached from  
1117 the cellular envelope. Some large VLFs contain sulfur (S) but many do not. Some  
1118 deformation of vesicles, particular large vesicles, occurred during the infiltration of resin.  
1119 Some dark matter, like DNA and RNA, are within vesicles but some were not. Note, the  
1120 lines across the micrograph are from the imperfections in the sectioning blade.

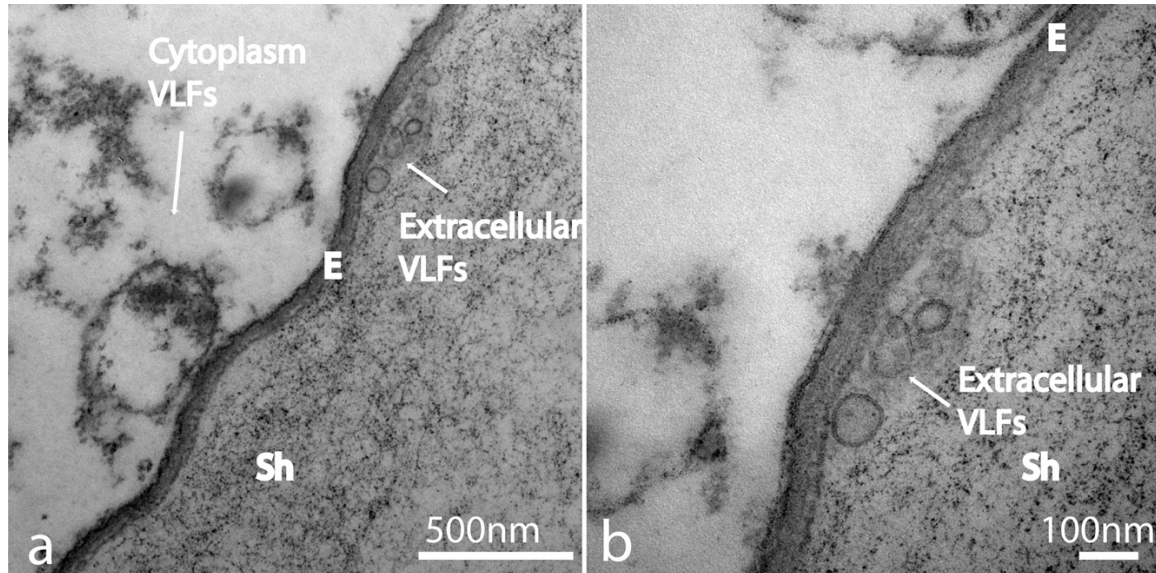

1121

1122 **S3 Fig. Transmission electron microscopy images of the cellular envelope of *Ca.***  
1123 ***Thiomargarita* spp. revealing the production of outer membrane vesicles exterior to**  
1124 **the outermost layer (S-layer). (a) Outer membrane vesicles appear smaller in size to**  
1125 **intracellular vesicles. (b) Outer membrane vesicles appear to have bi-layered walls. E =**  
1126 **envelope and Sh = sheath.**

1127 **S1 Movie. Confocal Z-stack of a chain *Ca. Thiomargarita* spp. incubated with FDAAs**  
1128 **for 30 minutes revealed reductive cell division as seen in Figure 2c.**

1129 **S2 Movie. Confocal Z-stack of a *Ca. Thiomargarita* spp. cell undergoing cell division,**  
1130 **as seen in Fig. 4, reveal PG bound vesicles detached from the envelope.**

1131 **S3 Movie. 3D rendering and surface reconstruction of cell, featured in Fig. 4 and S2**  
1132 **Movie, explores the division plane and intracellular environment.**

1133 **S4 Movie. Confocal Z-stack of a *Ca. Thiomargarita* spp. cell, featured in Fig. 5a-b**  
1134 **stained with wheat germ agglutinin.**



1135 **S5 Movie. Confocal Z-stack of a *Ca. Thiomargarita* spp. cell, featured in Fig. 5a-b and**

1136 **S4 Movie, stained with DAPI.**

1137 **S1 Data. Putative genes in genomes *Ca. T. nelsonii* pertaining to chromosome**

1138 **partitioning, outer membrane, cell division, PG synthesis and degradation and cell**

1139 **elongation.**

1140 **S2 Data. Putative genes in genomes *Ca. T. nelsonii* pertaining to membrane lipids,**

1141 **cytoskeletal proteins, flotillins, small GTPases, as well as other genes queried for in**

1142 **the genomes.**
